# Supplementary material
Source: PubMed Central journal article supplement (PMC5486215)
Supplement: NIHMS865140-supplement-Complete_Supplement.pdf [file NIHMS865140-supplement-Complete_Supplement.pdf]

**Supplementary Material for:**

**Control of cell elongation by a novel member of the *S. pneumoniae* MreCD complex**

Andrew K. Fenton<sup>1</sup>, Lamy El Mortaji<sup>1</sup>, Derek T. C. Lau<sup>1</sup>, David Z. Rudner<sup>1\*</sup>, Thomas G. Bernhardt<sup>1\*</sup>

<sup>1</sup>Department of Microbiology and Immunobiology  
Harvard Medical School  
Boston, MA 02115

\*To whom correspondence should be addressed

David Z. Rudner  
Harvard Medical School  
Department of Microbiology and Immunobiology  
Boston, Massachusetts 02115  
e-mail: david\_rudner@hms.harvard.edu

Thomas G. Bernhardt, Ph.D.  
Harvard Medical School  
Department of Microbiology and Immunobiology  
Boston, Massachusetts 02115  
e-mail: thomas\_bernhardt@hms.harvard.edu

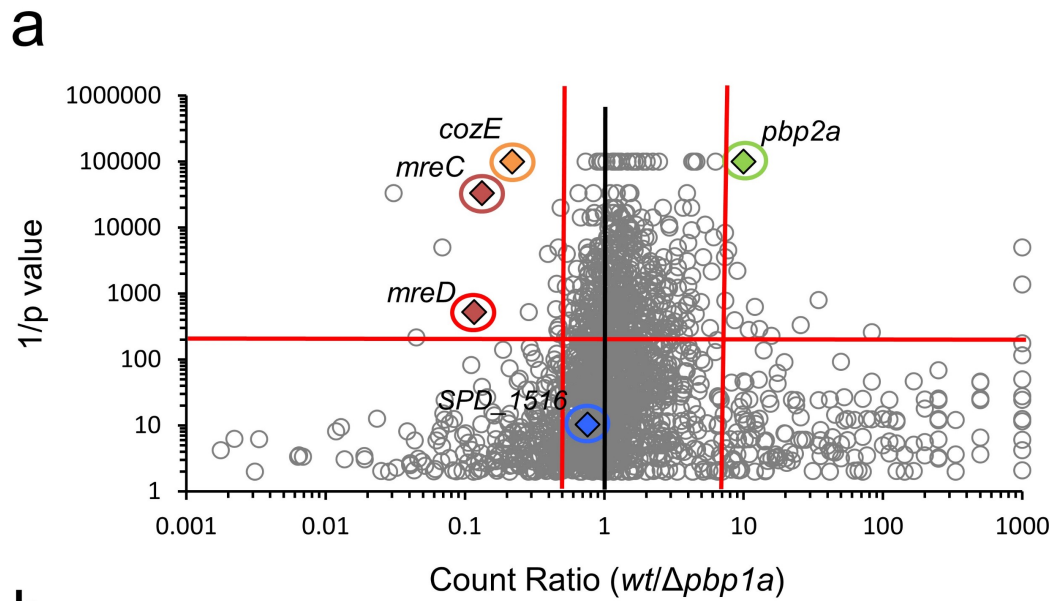

**b**

| Locus Name   | Number of TA sites in ORF | Count Ratio ( <i>wt/Δpbp1a</i> ) | U stat | p-value |
|--------------|---------------------------|----------------------------------|--------|---------|
| <i>cozE</i>  | 112                       | 0.22                             | 4507   | 0.00    |
| <i>mreC</i>  | 63                        | 0.12                             | 1592   | 0.0019  |
| <i>mreD</i>  | 49                        | 0.13                             | 745    | 0.00003 |
| <i>pbp2a</i> | 145                       | 10                               | 3814   | 0.00    |
| SPD_1516     | 69                        | 0.75                             | 2081   | 10.34   |

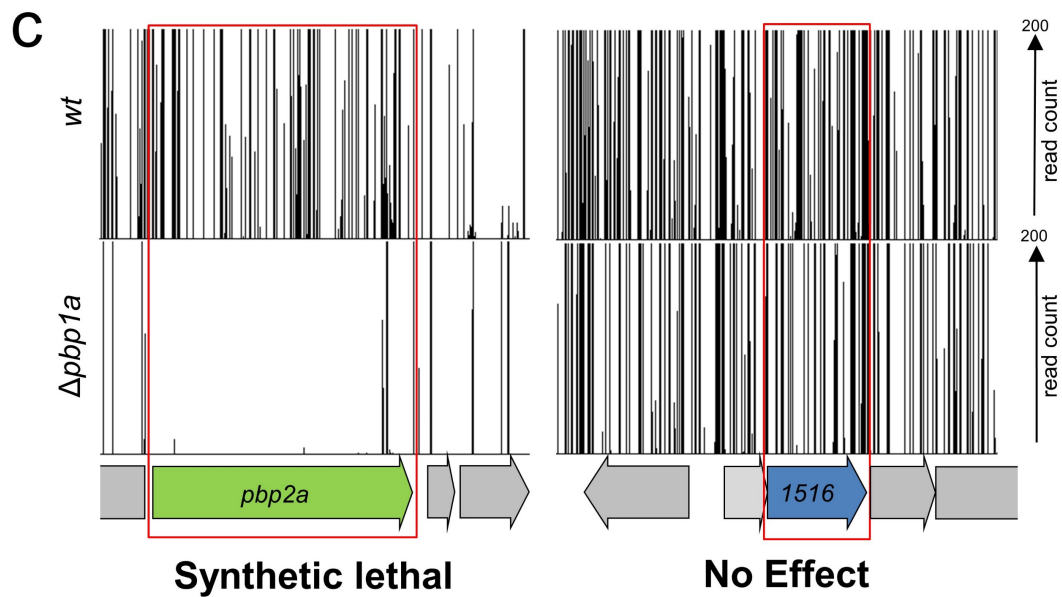

Supplementary Figure 1

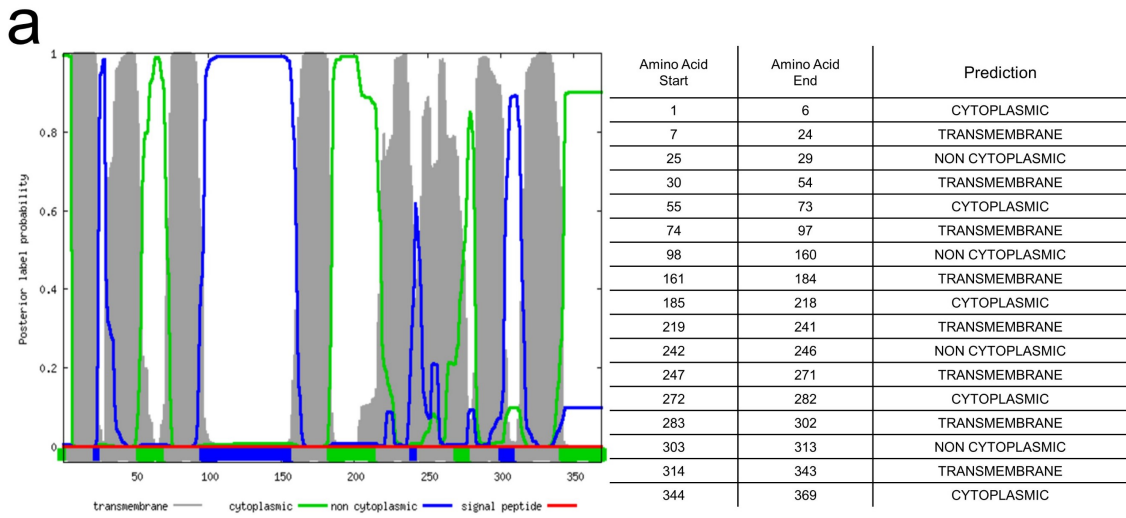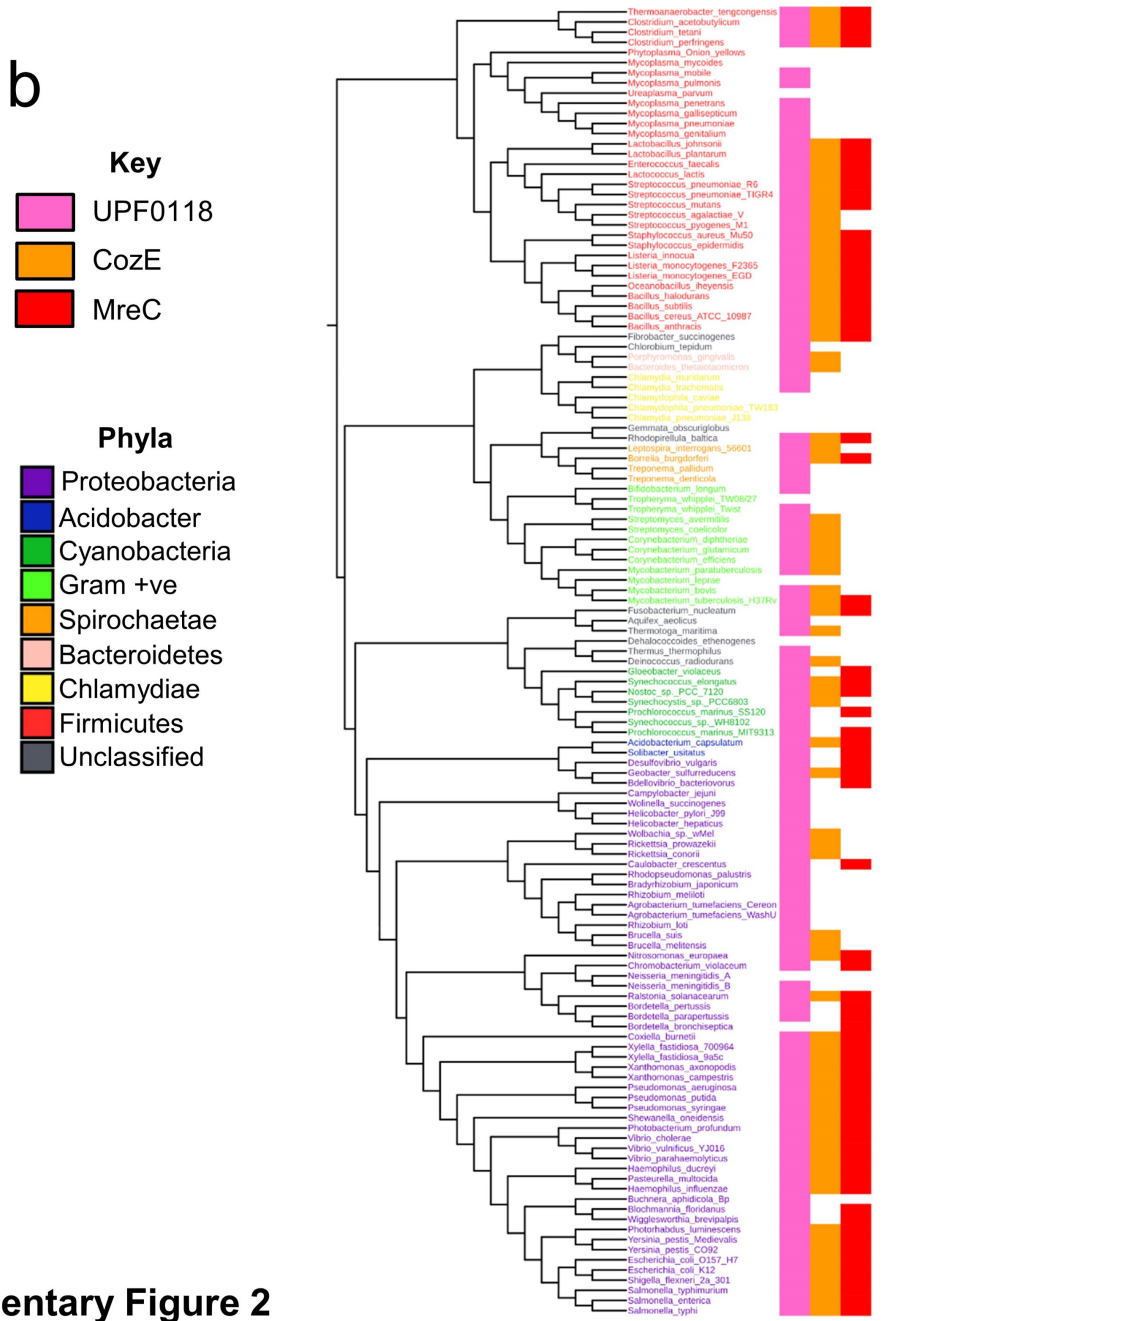

**Supplementary Figure 2**

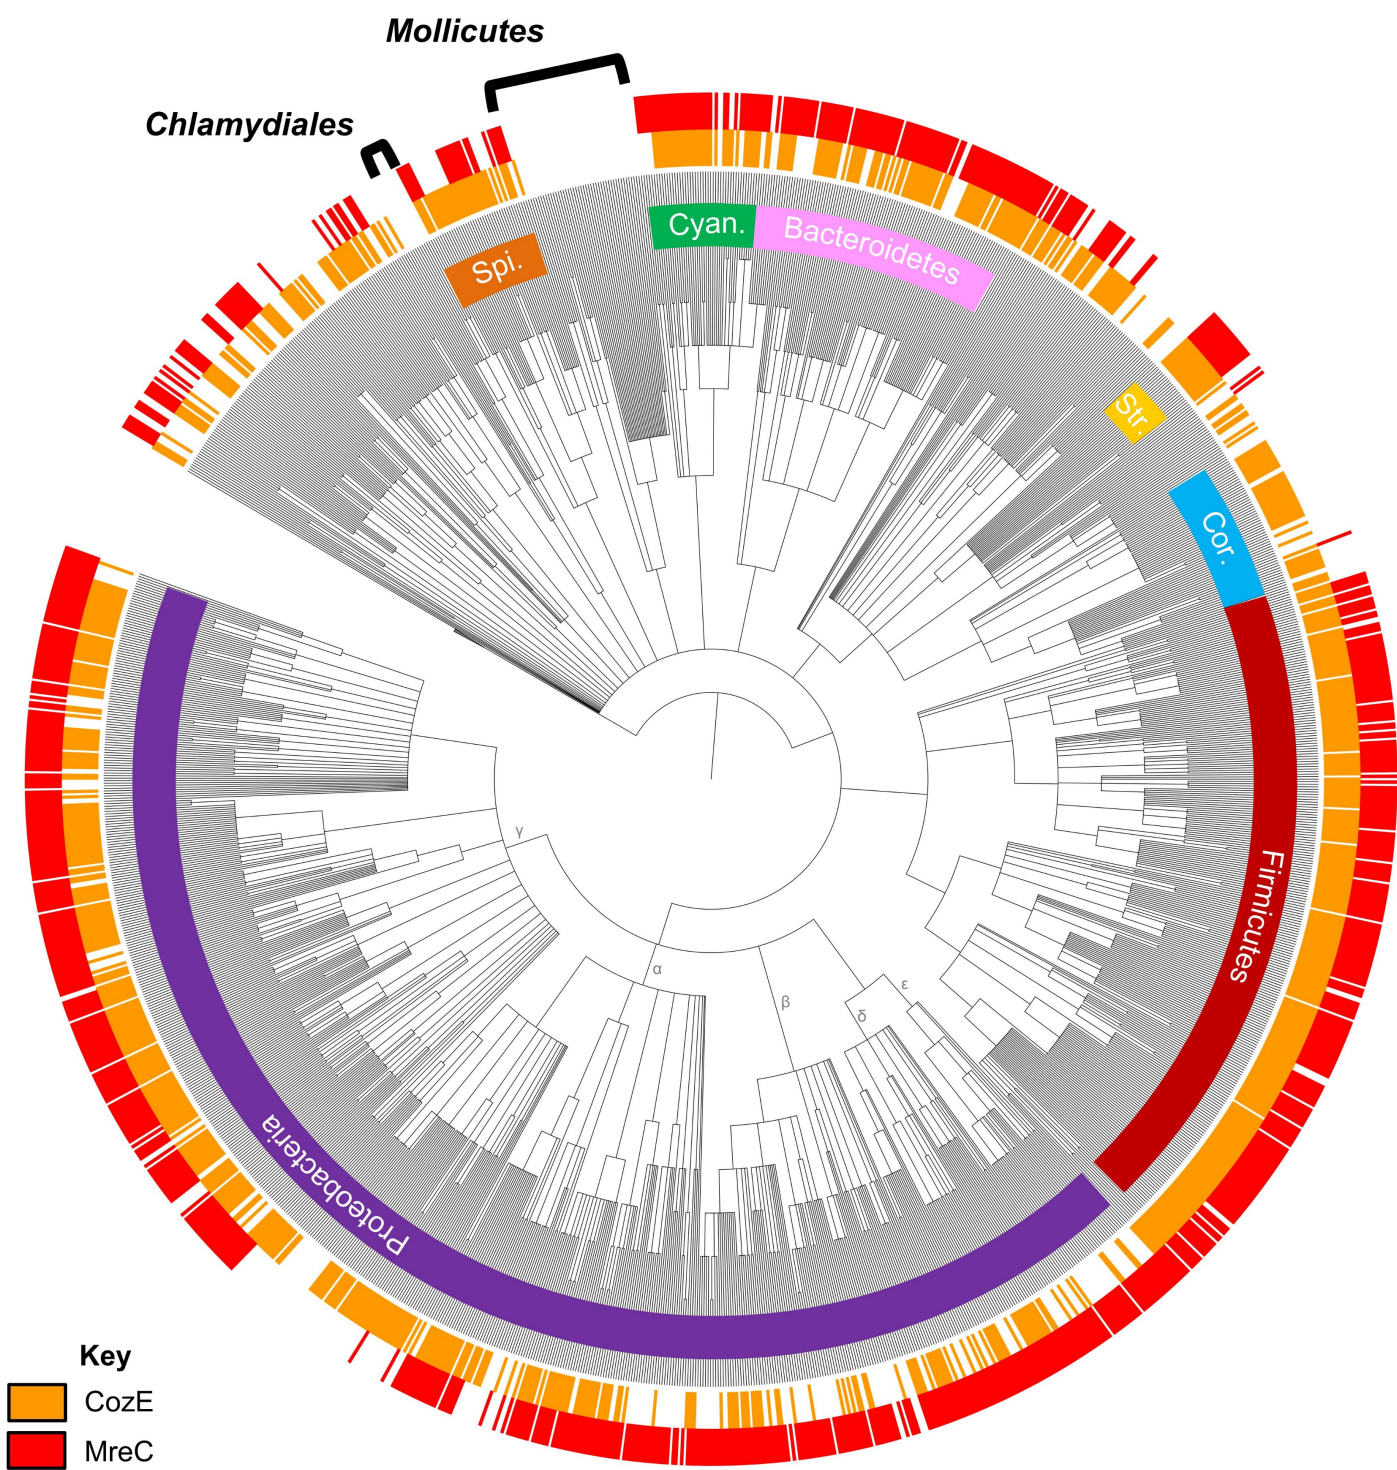

Supplementary Figure 3

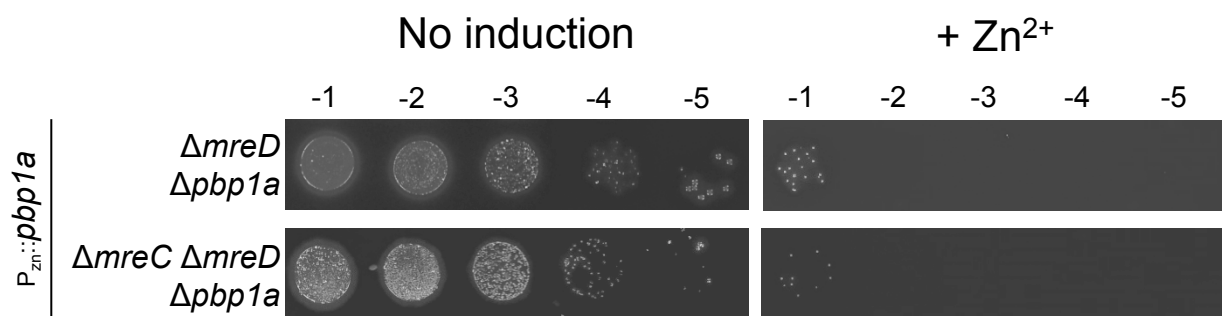

Supplementary Figure 4

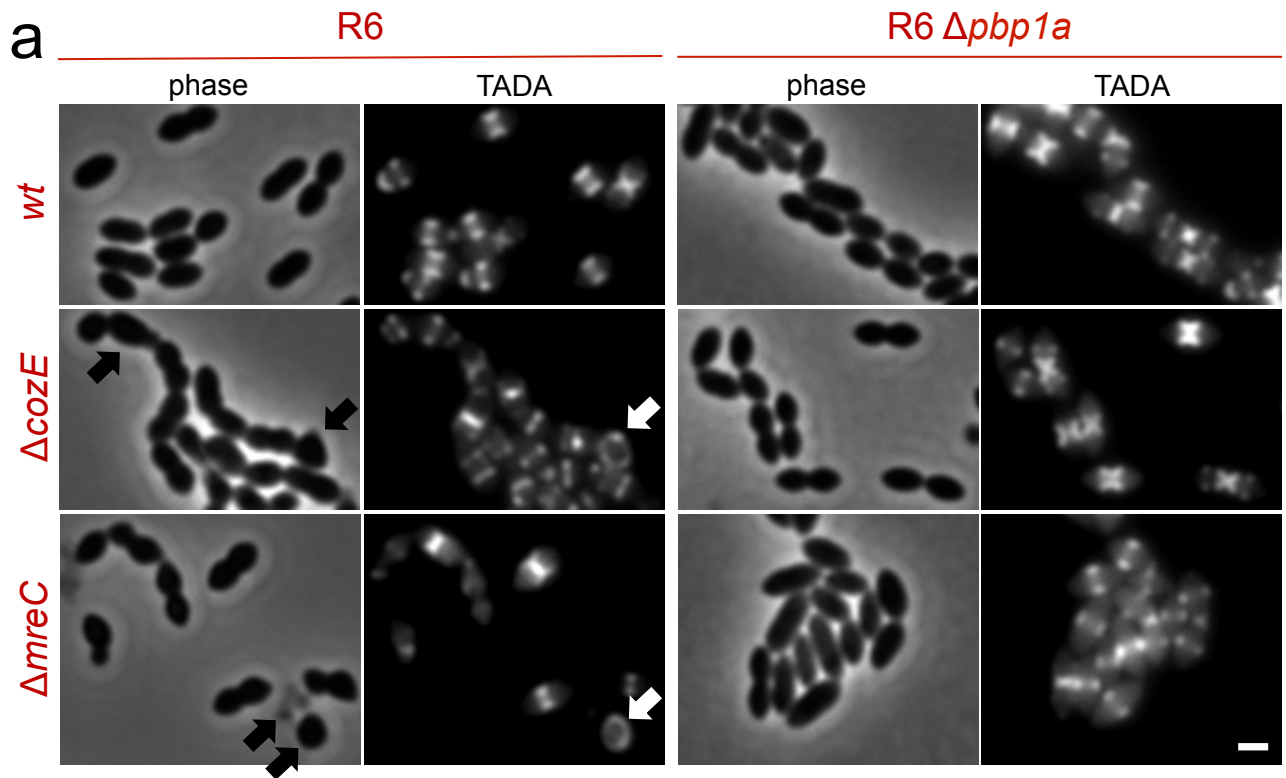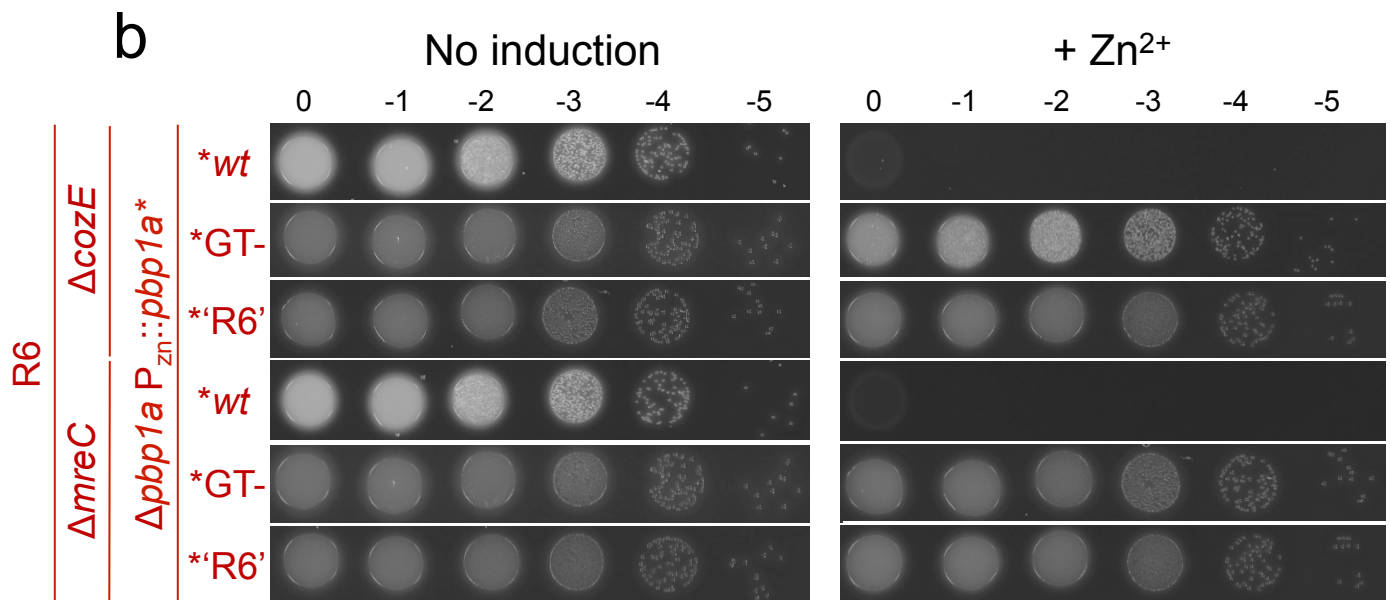

Supplementary Figure 5

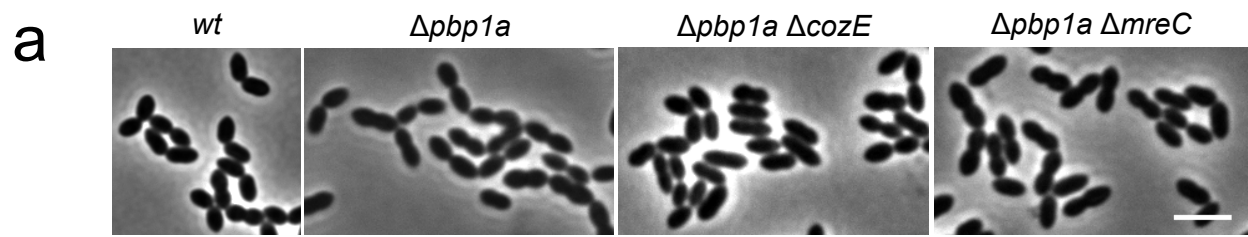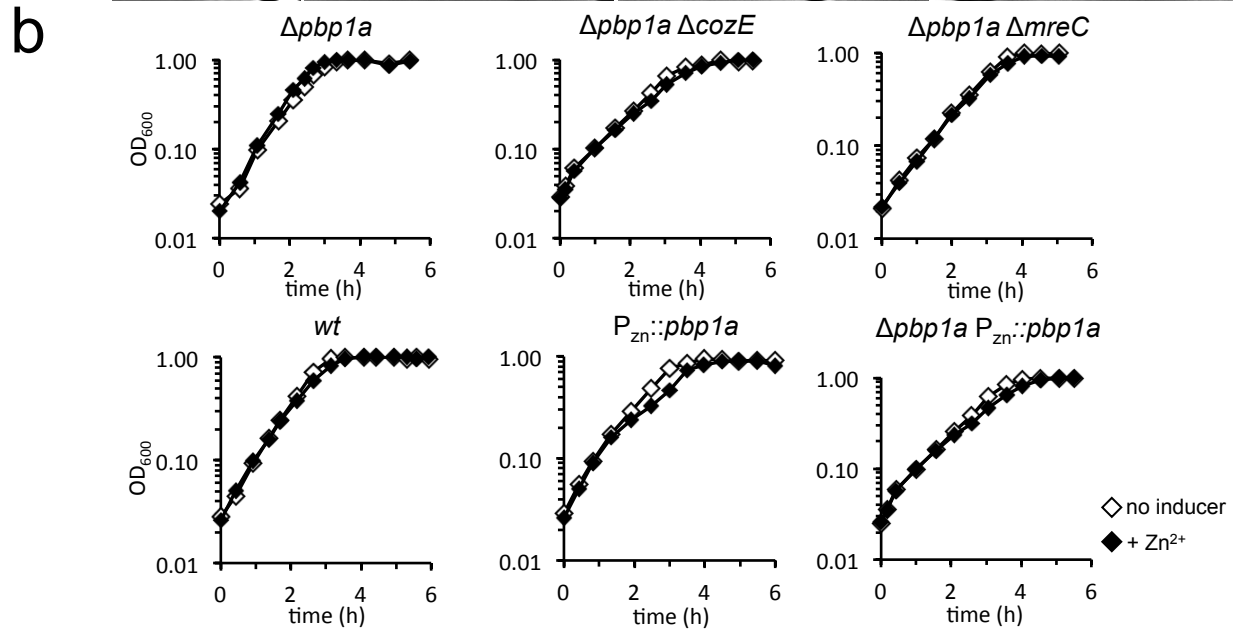

Viability 6 h post induction

Viability 8 h post induction

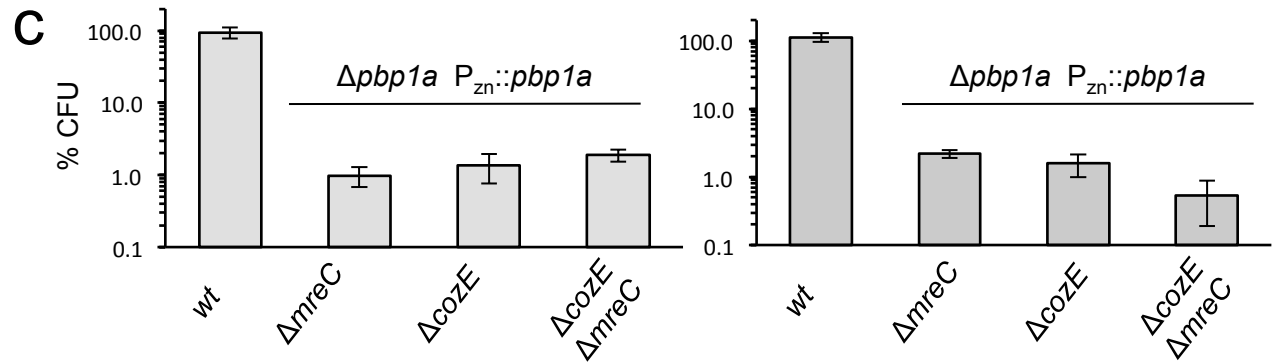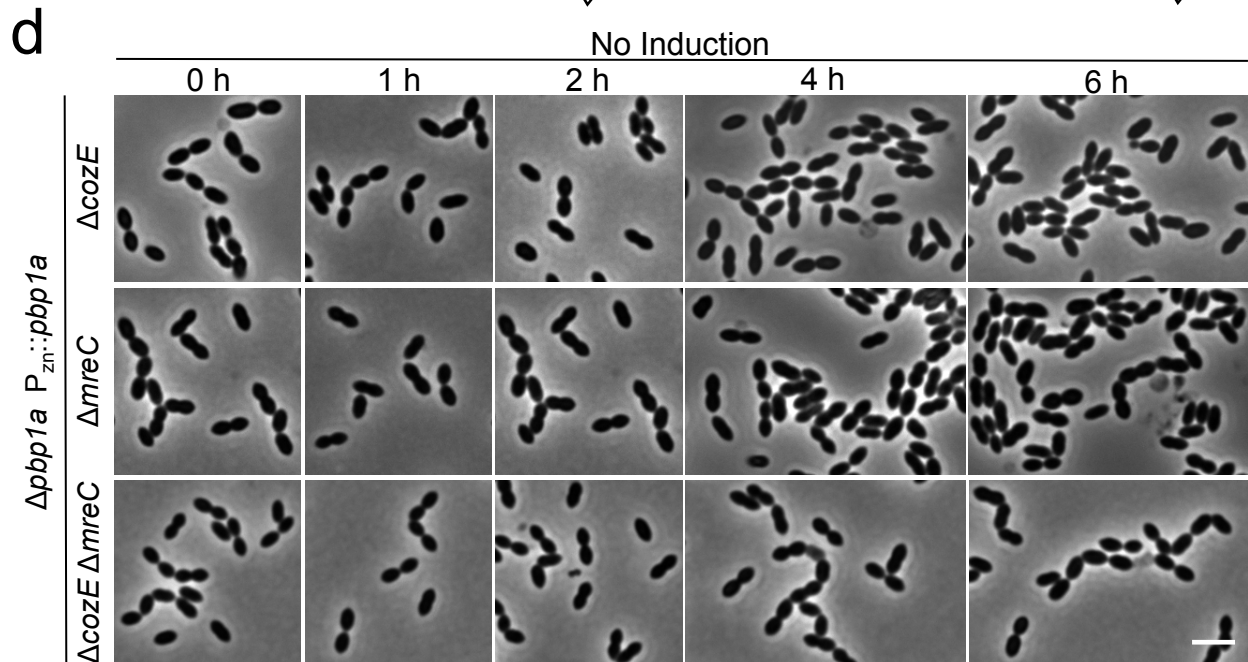

Supplementary Figure 6

**a**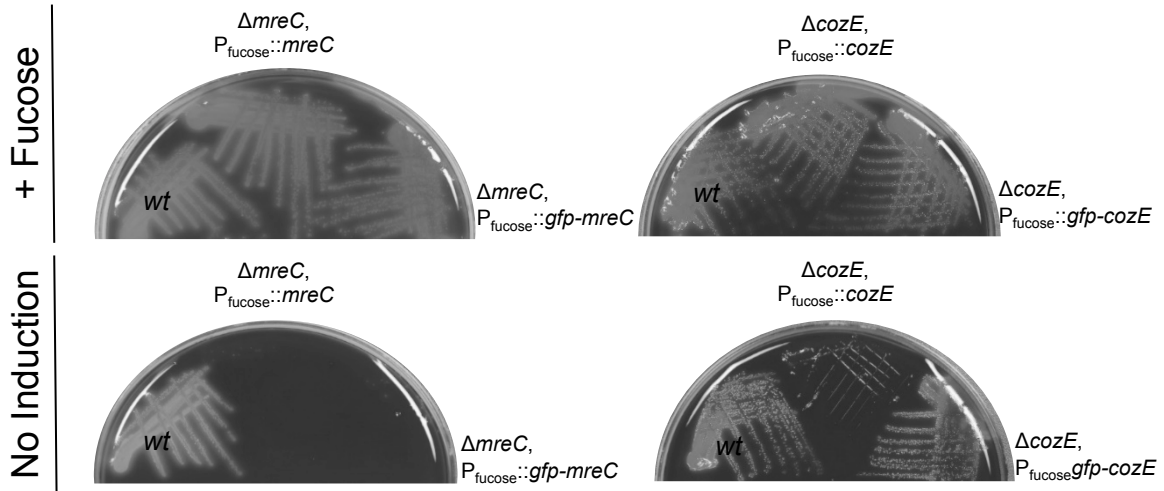**b**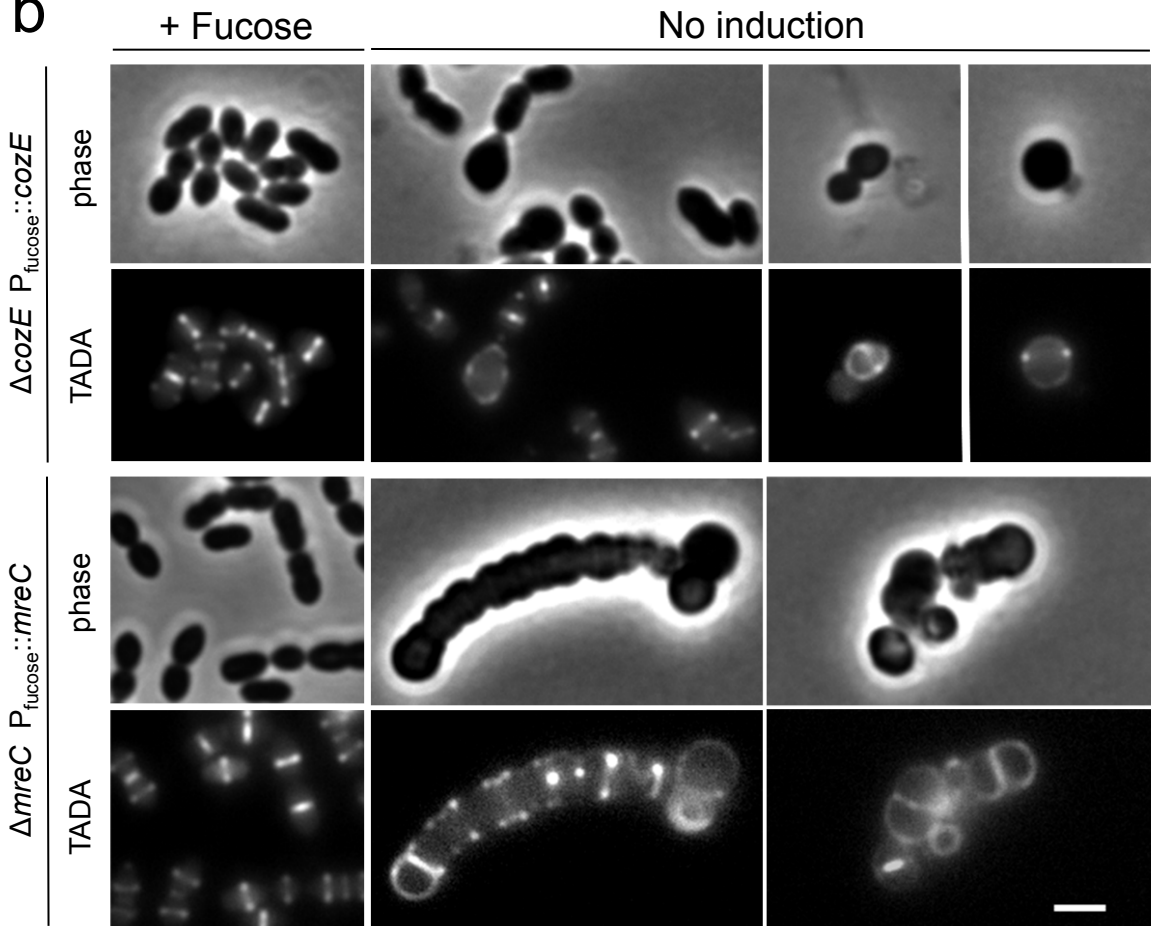

Supplementary Figure 7



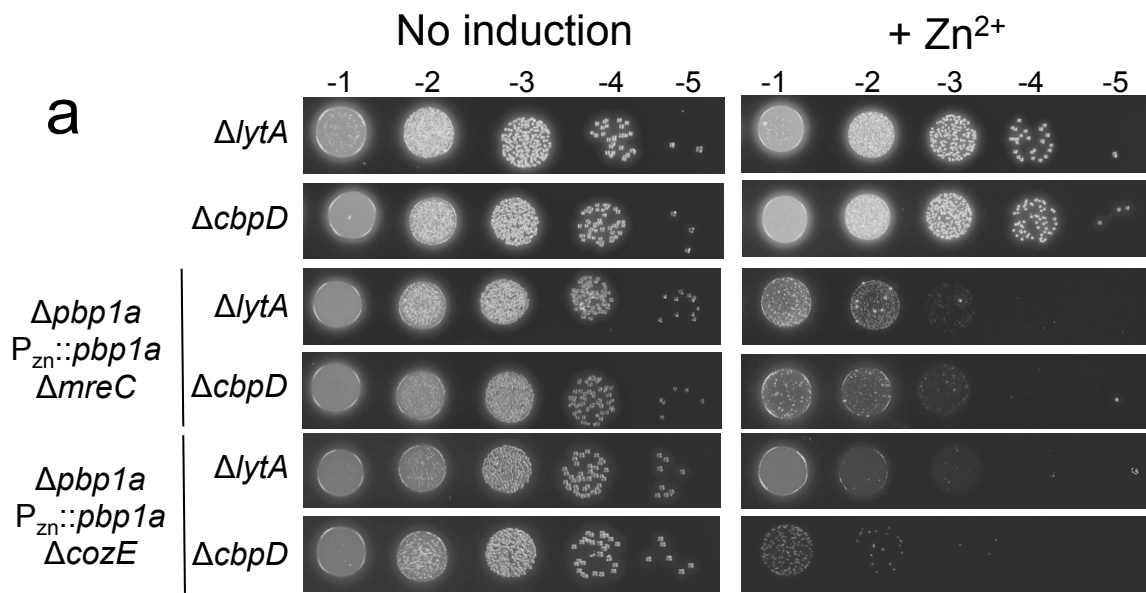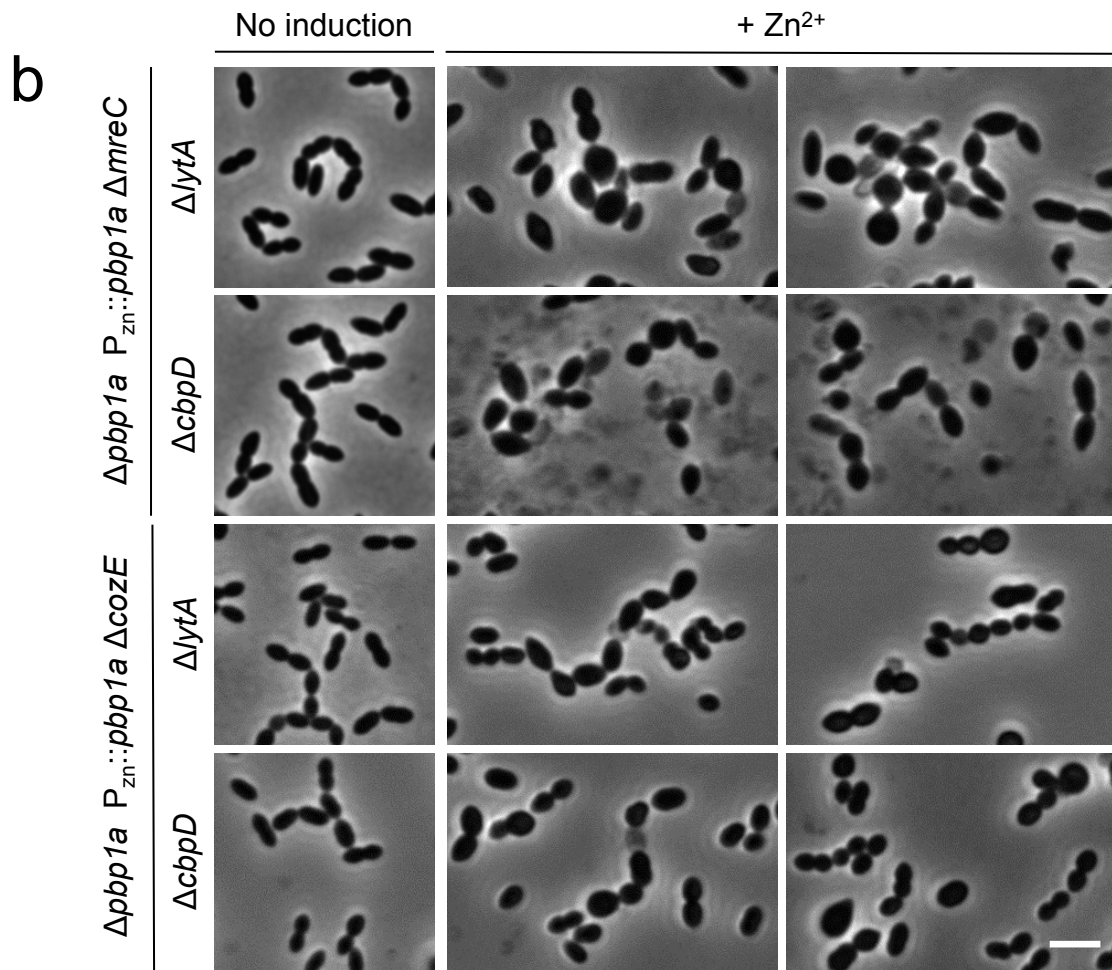

Supplementary Figure 8

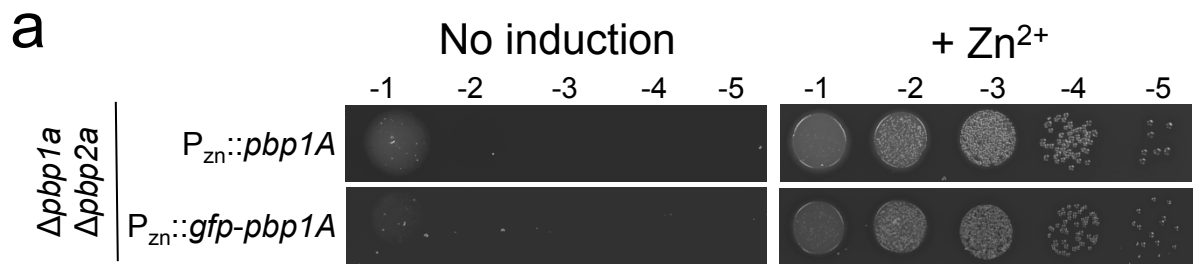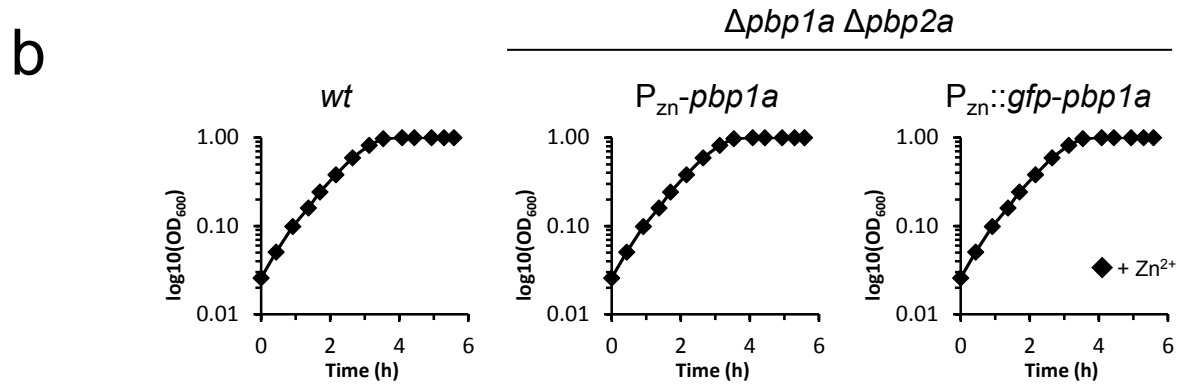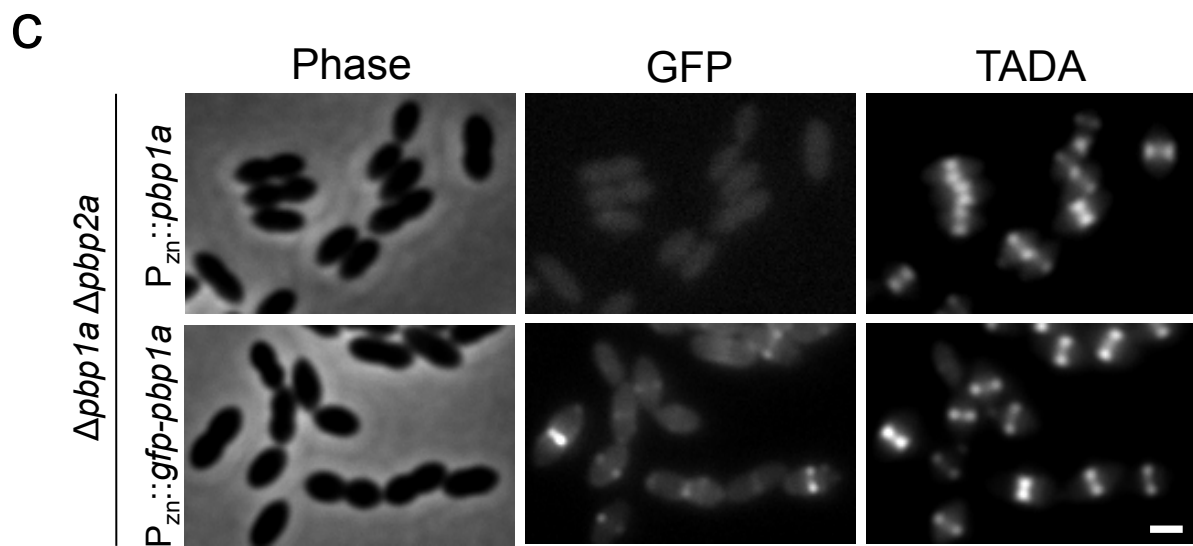

Supplementary Figure 9

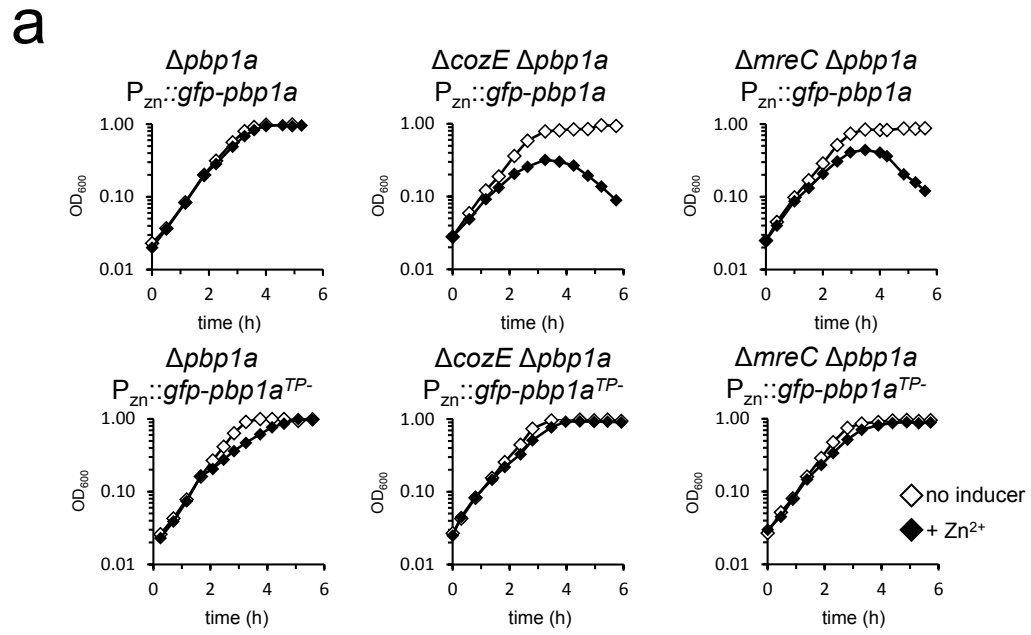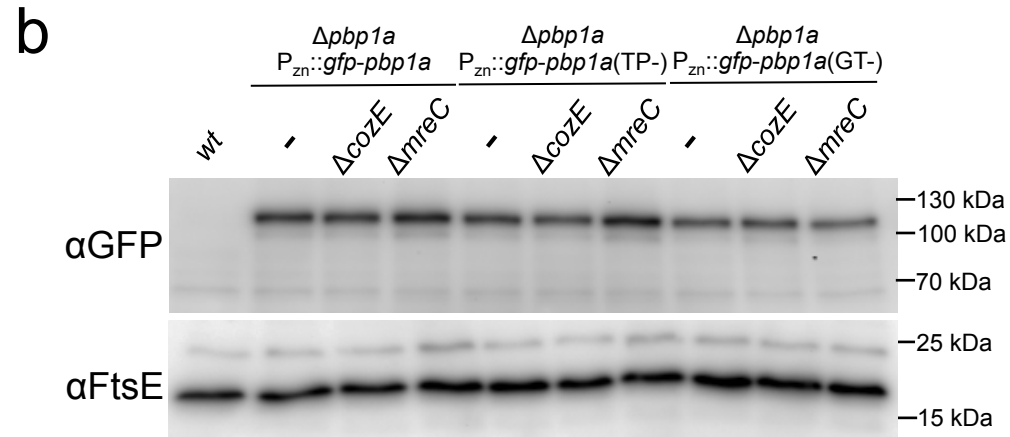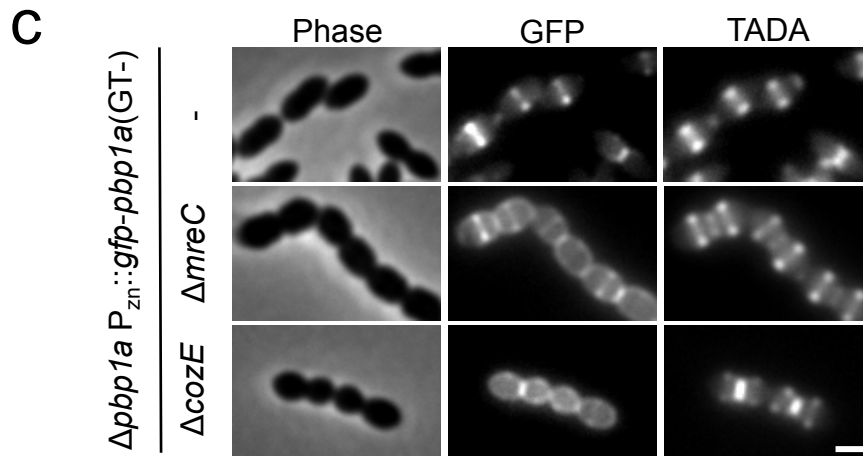

Supplementary Figure 10

**a** GFP-PBP1a signal (4 h)

$\Delta pbb1a$   $P_{zn}::gfp-pbb1a$

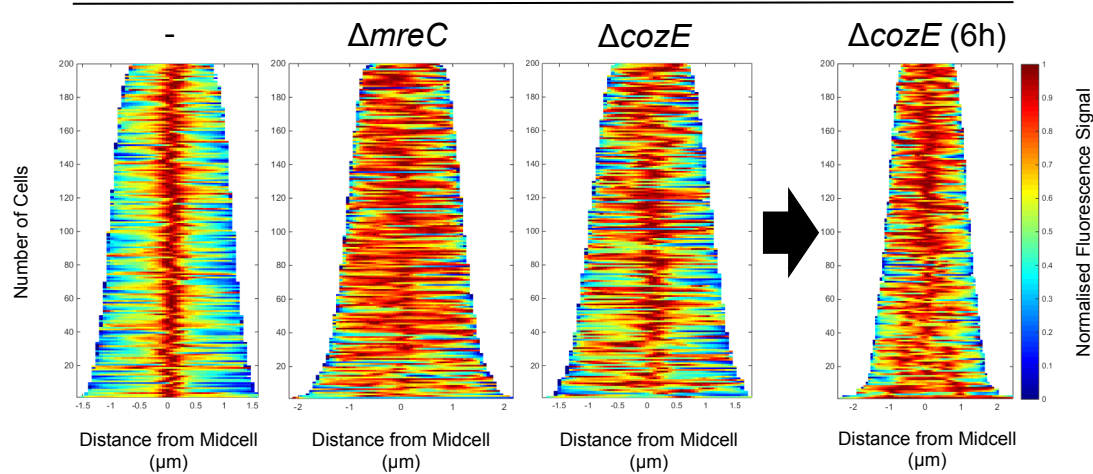

**b** TADA labelling signal (4 h)

$\Delta pbb1a$   $P_{zn}::gfp-pbb1a$

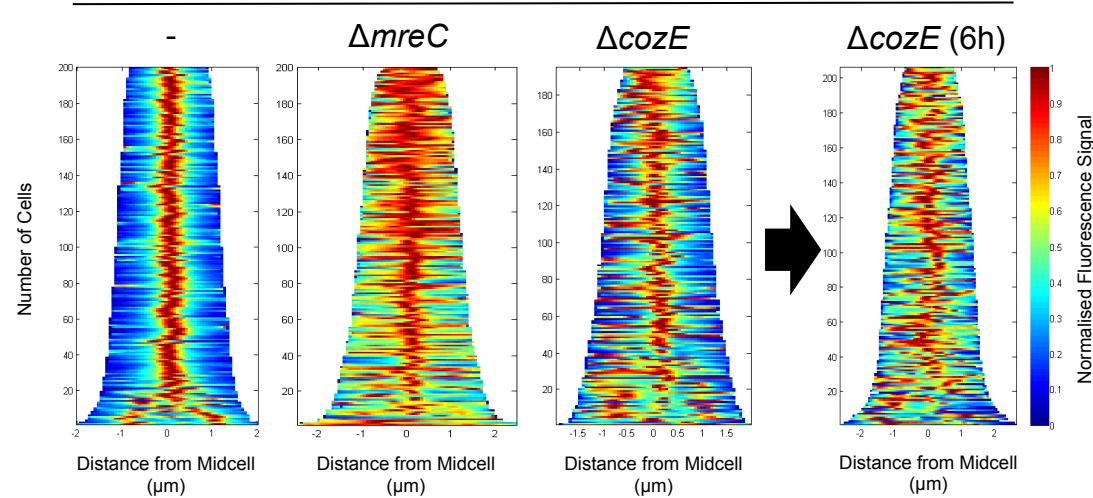

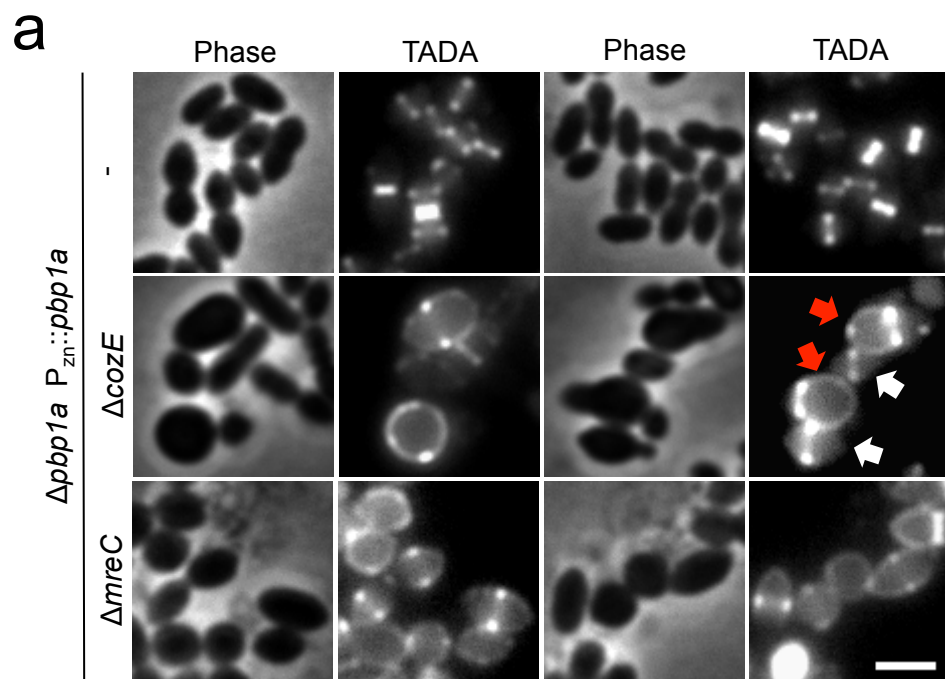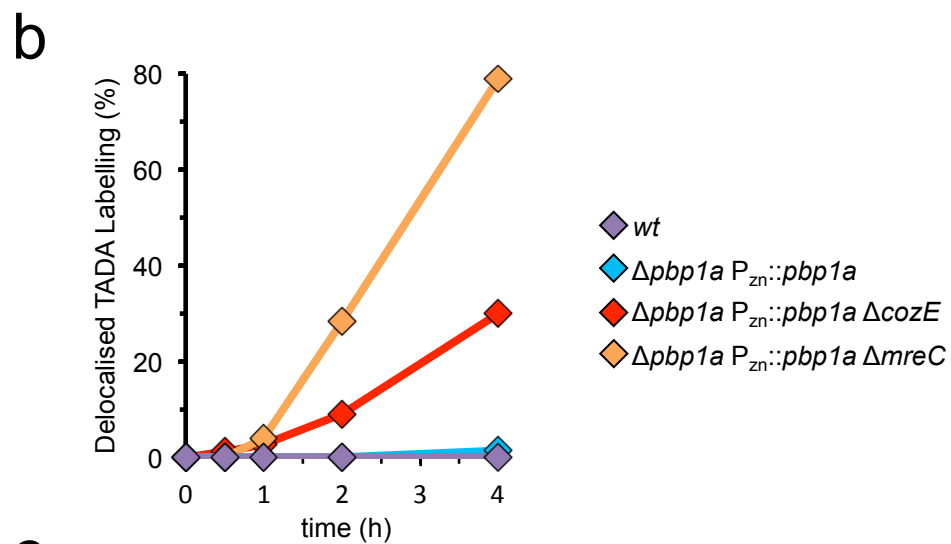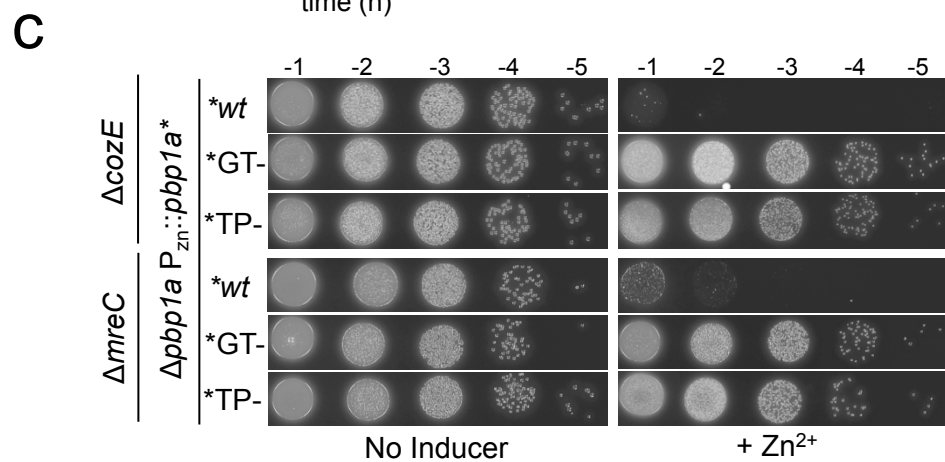

Supplementary Figure 12

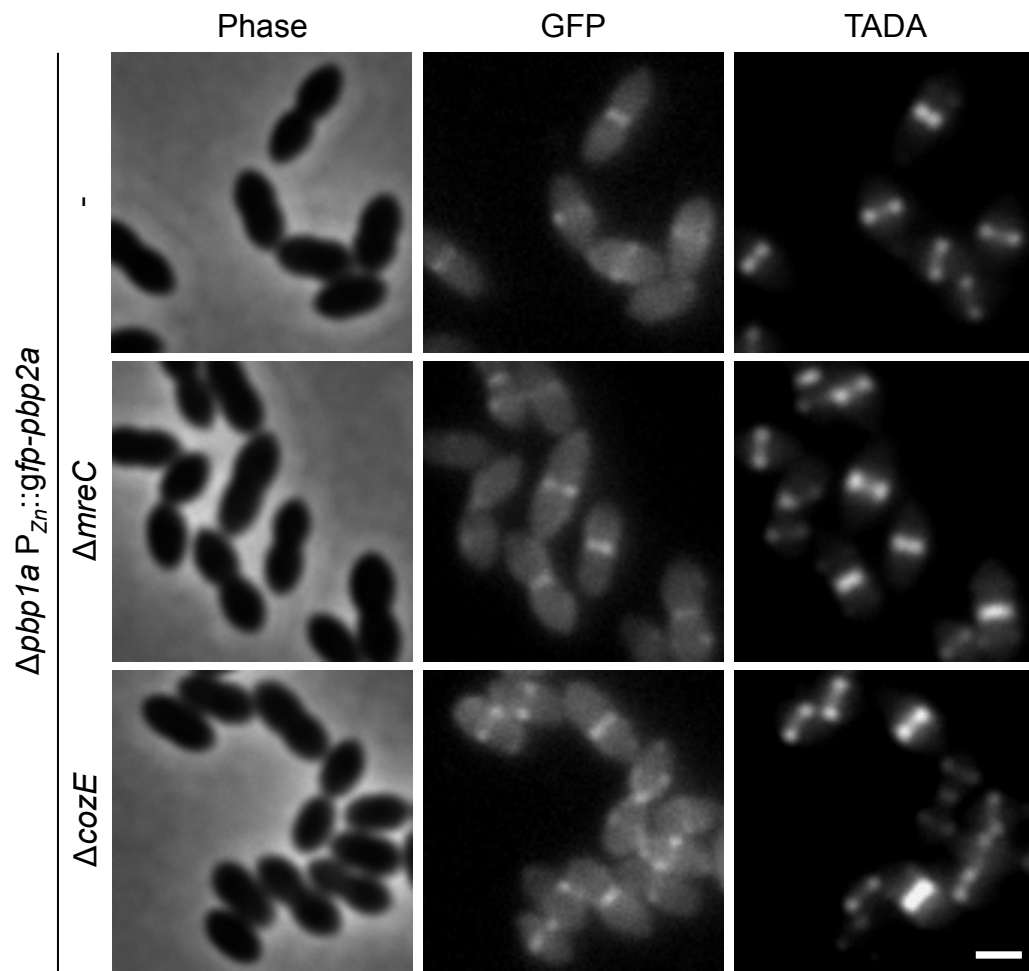

Supplementary Figure 13

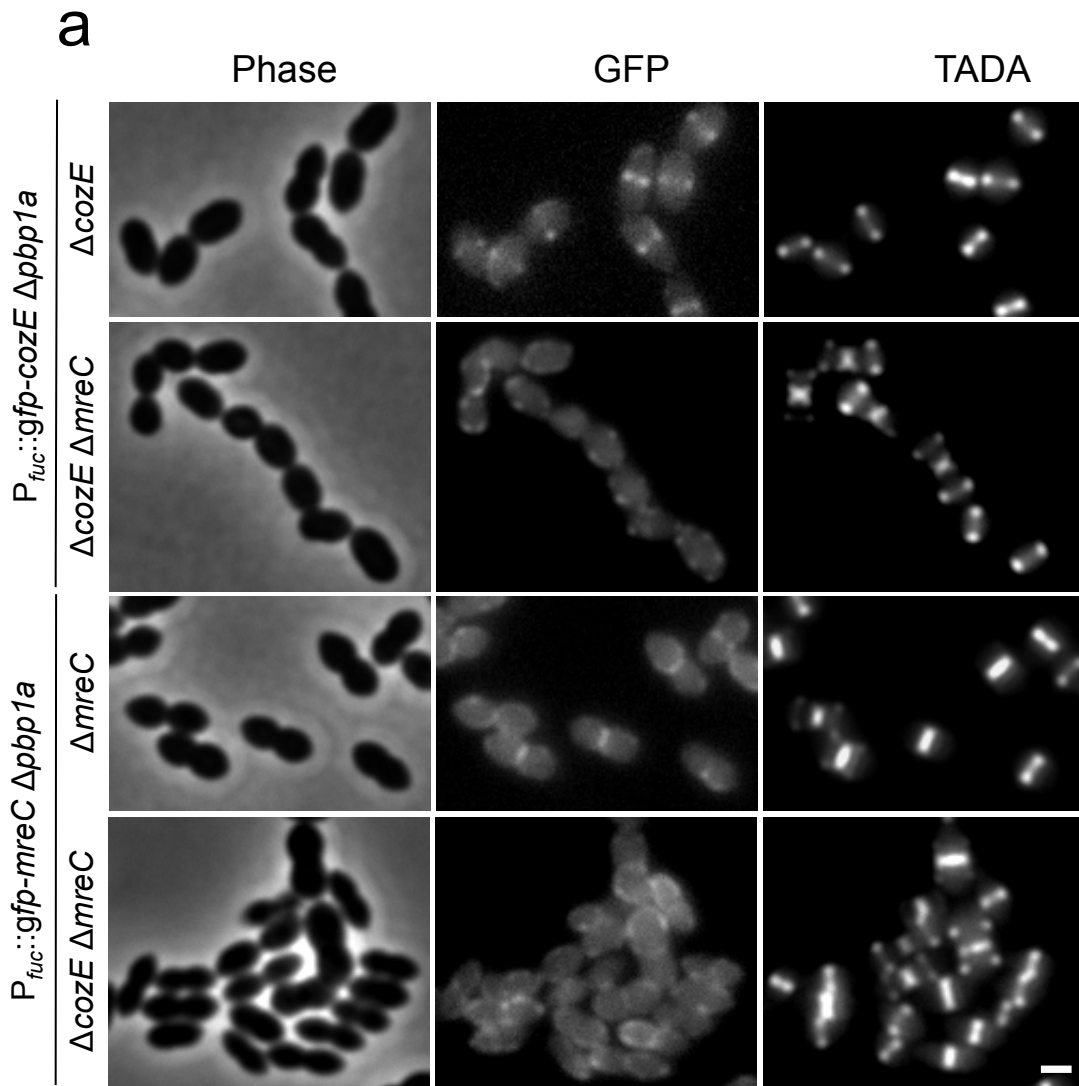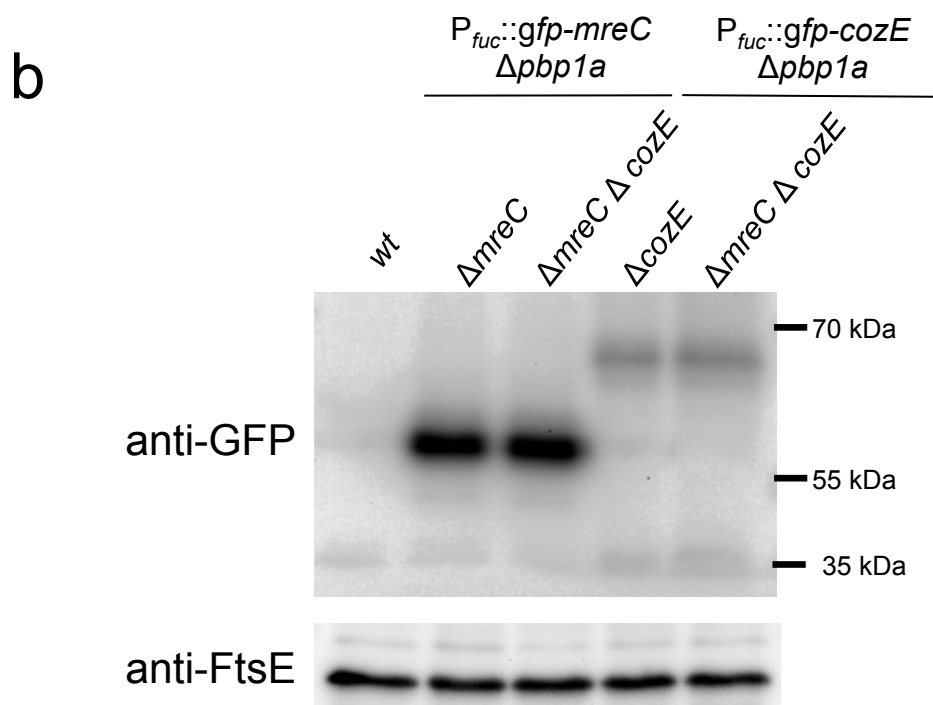

Supplementary Figure 14

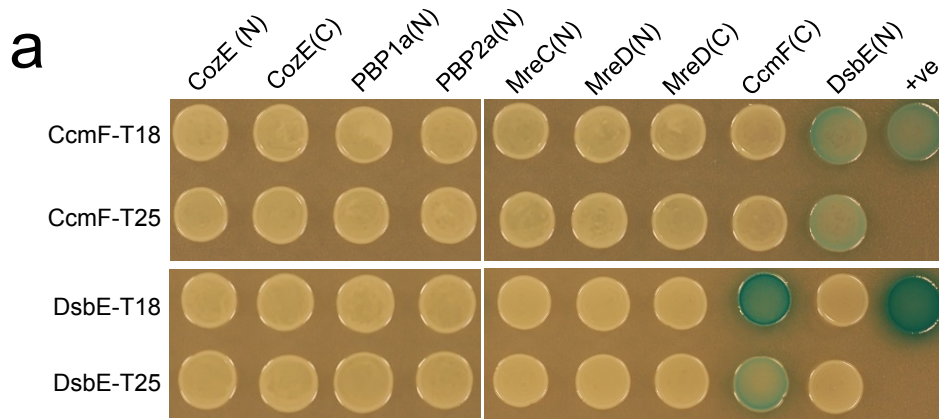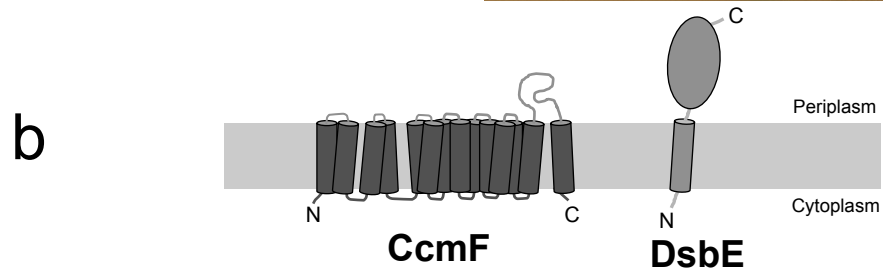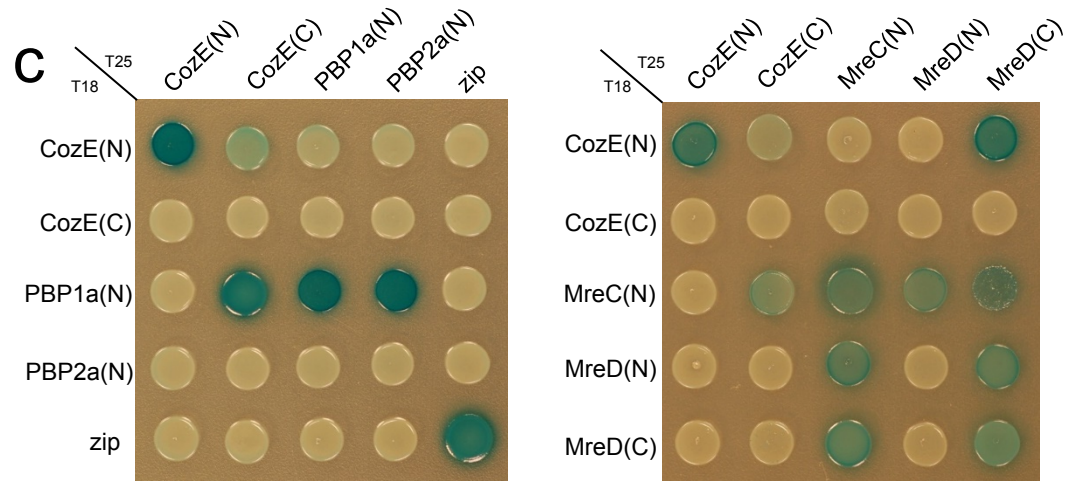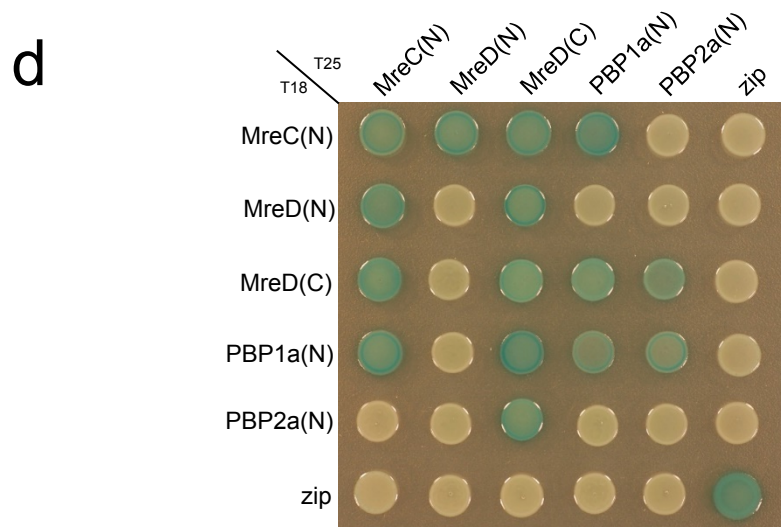

Supplementary Figure 15



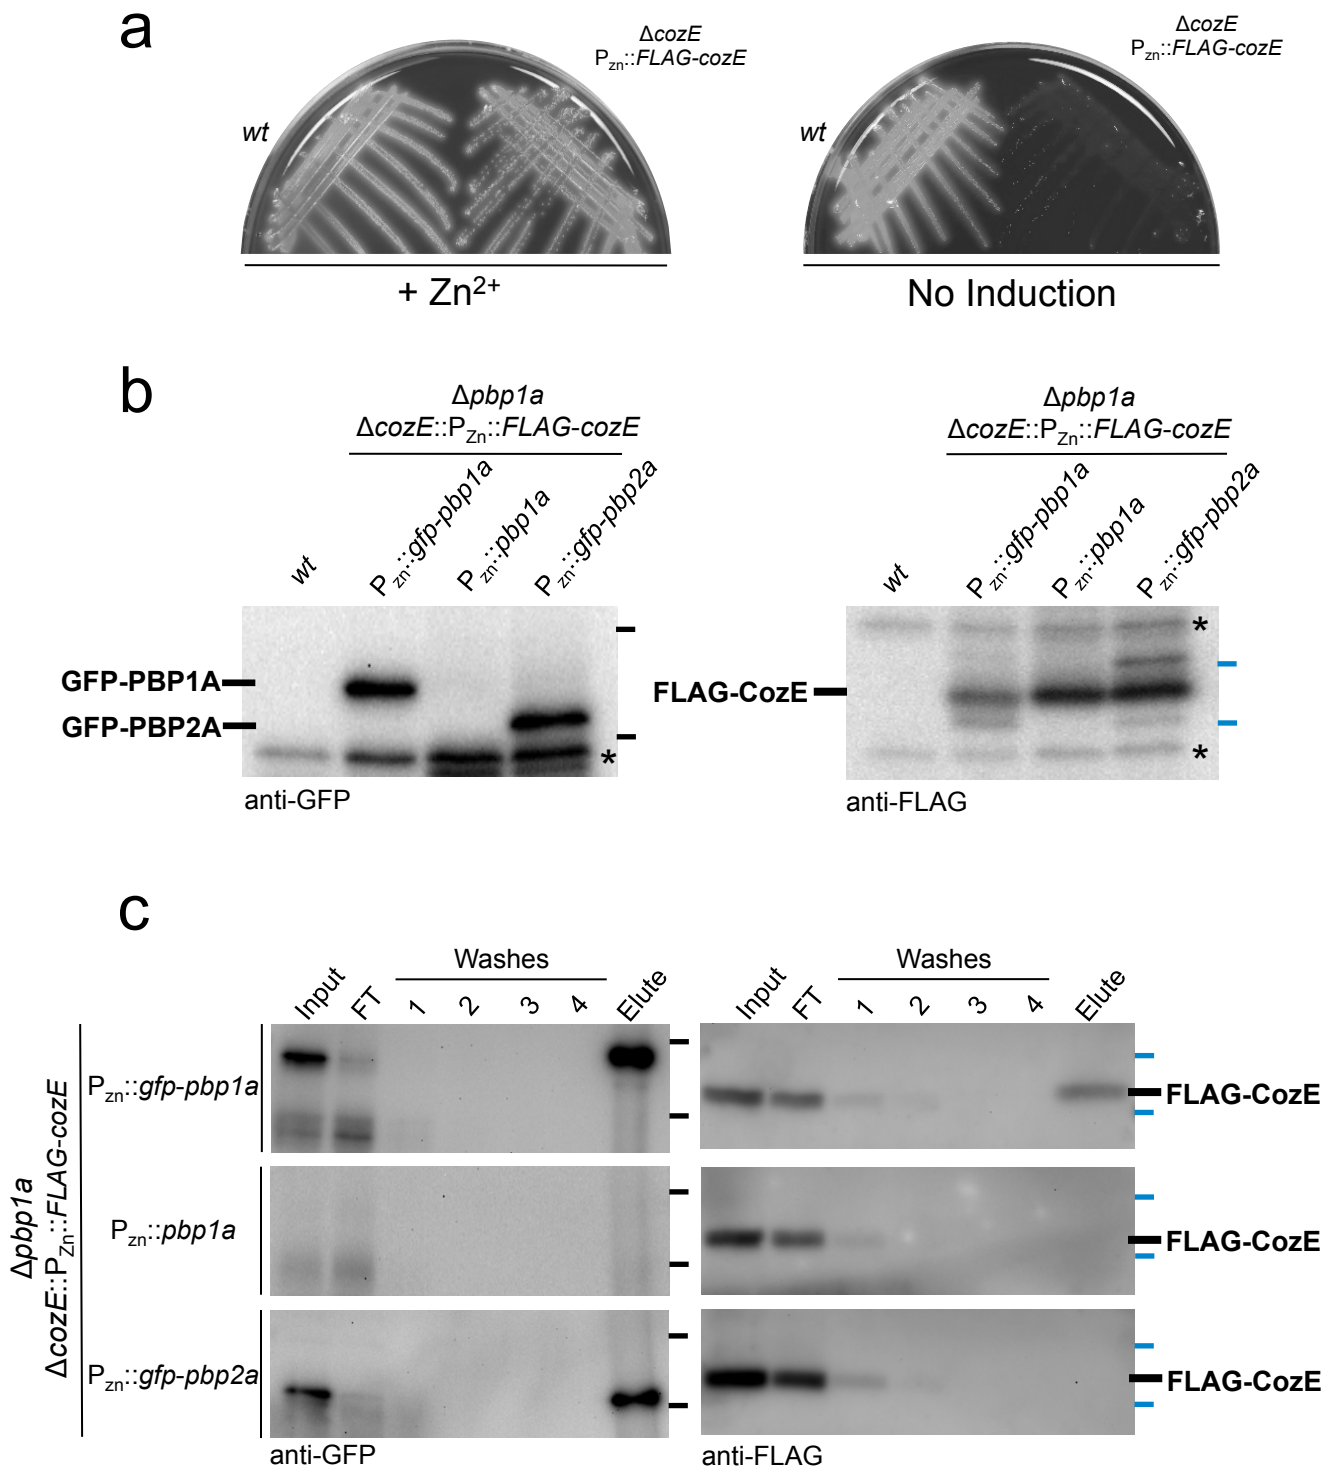

Supplementary Figure 16

## Supplementary Figure Legends

### **Supplementary Figure 1 | $\Delta$ *pbp1a* Tn-Seq data reveals novel genetic relationships.**

Whole genome transposon insertion data was divided into TA site insertion profiles for each ORF. The raw number of sequence reads at each insertion site was calculated for each condition (strain) and the ratio calculated (the more skewed the ratio, the more likely the hit will verify). TA insertion profiles were compared by a Mann-Whitney U test to evaluate differential insertion profiles (the more significant, the more likely the hit will verify).

**a**, An inversed volcano plot showing *wt* vs  $\Delta$ *pbp1a* Tn-Seq data. Red lines indicate cut off values used by this study to identify hits in the screen, p value < 0.0005 and count ratio > 7 fold. The novel hit *cozE* is highlighted in orange. Examples of a known synthetic lethal gene (*pbp2a*), synthetic viable (*mreCD*) genes and an ORF not essential in either library (SPD\_1516) are also highlighted.

**b**, Table showing *wt* vs  $\Delta$ *pbp1a* Tn-Seq output statistics of the ORFs highlighted in **a**. A Mann-Whitney U test is used find significant differences in transposon insertion profiles across each ORF.

**c**, Transposon insertion profiles for the known synthetically lethal gene: *pbp2a* and a gene non-essential in either library: SPD\_1516. The synthetic lethal gene has no apparent transposon insertions in the  $\Delta$ *pbp1a* strain, whereas SPD\_1516 has multiple insertions in each strain. Profiles contrast those of *cozE* and *mreCD* shown in **Fig. 1a**.

### **Supplementary Figure 2 | CozE is a conserved polytopic membrane protein.**

**a**, Output from the Phobius web server for CozE (SPD\_0768) topology. Phobius uses a hidden Markov model which assesses sub-regions of a protein in a series of interconnected submodels to generate a topological prediction. Graph indicates the probability that sequences are cytoplasmic or non-cytoplasmic and the presence of transmembrane regions long the length of the protein sequence. The corresponding amino acid positions for predicted non-cytoplasmic/membrane/cytoplasmic transitions are shown in the table on the right. Phobius can be found at: (<http://phobius.sbc.su.se/>). Data was used to draw the schematic of the predicted membrane topology of CozE shown in **Fig. 1b**.

**b**, Annotated linearised version of the phylogenetic tree shown in **Fig. 1c**, showing the species names of all 129 diverse bacterial species. The phylum each species belongs to is indicated by the colour of the text. The presence of UPF0118 family members are indicated in pink on each leaf. Organisms with a *S. pneumoniae* CozE/MreC homologue are indicated in orange/red (e-value cut off =  $1 \times 10^{-4}$ ). CozE and MreC show strong co-occurrence particularly in the Firmicutes and Proteobacteria. The tree was constructed using the Interactive Tree Of Life (v2) web-based tool, currently running version 3 (<http://itol.embl.de/>).

### **Supplementary Figure 3 | *S. pneumoniae* CozE and MreC co-occur across bacterial species and are absent in bacteria lacking a cell wall.**

Phylogenetic tree showing CozE *S. pneumoniae* homologues across 1,576 bacterial species. Strains containing a homologous sequence are indicated by an orange (CozE) or red (MreC) bar on each leaf respectively. CozE and MreC show strong co-occurrence, particularly in the Firmicutes and Proteobacteria phyla. Notable groups without CozE and MreC homologues are the Mollicutes Class, which are known to lack a cell wall suggesting these proteins are required for cell wall biogenesis. In addition both homologues are absent from the Chlamydiales which carry out cryptic cell wall biosynthesis with a reduced set enzymes <sup>1</sup>. Cor. = Corynebacteriales, Cyan. = Cyanobacteria, Spi. = Spirochaetae and Str. = Streptomycetes. The tree was constructed using NCBI BLASTp, using the *S. pneumoniae* CozE protein sequence as the query to search against a database of bacterial genomes with an e-value cut off of  $1 \times 10^{-4}$ . To identify the diverse MreC homologues across species a mixed query was used consisting of: *S. pneumoniae*, *E. coli*, *C. crescentus*, *C. jejuni*, *S. coelicolor* and *B. fragilis* sequences; again with an e-value cut off of  $1 \times 10^{-4}$ . This analysis was carried out using the Harvard Medical School research computing cluster Orchestra (<https://rc.hms.harvard.edu/#orchestra>). The tree was drawn using the Interactive Tree Of Life (v3) web-based tool (<http://itol.embl.de/>) <sup>2</sup>.

### **Supplementary Figure 4 | Both *mreD* and the *mreCD* operon are essential in *pbp1a*<sup>D39</sup> *S. pneumoniae* cells.**

The indicated *S. pneumoniae* strains were grown to exponential phase and normalised to an OD<sub>600</sub> of 0.2. Resulting cultures were serially diluted and 5 µl of each dilution spotted onto TSAII 5%SB plates in the presence or absence of 600 µM ZnCl<sub>2</sub>. Plates were incubated at 37°C in 5% CO<sub>2</sub> cabinet and imaged.

### **Supplementary Figure 5 | The *pbp1a*<sup>D39</sup> allele is lethal in *S. pneumoniae* R6 strains lacking CozE and MreC.**

**a**, Microscopic analysis of R6 strains mutant strains. Strains were grown to mid-exponential phase, back diluted to an OD<sub>600</sub> of 0.025 in THY and incubated at 37°C in a 5% CO<sub>2</sub> cabinet for 3 h 45 min. Where necessary cultures were further back diluted at 2 h to avoid high cell densities. Cells were labelled with TADA for 15 min prior to imaging on 2% agarose pads.  $\Delta$ *cozE* and  $\Delta$ *mreC* deletions are viable in the R6 strain background. However, strains show mild morphological defects and evidence of lysis (black arrows). Rarely cells show delocalised TADA incorporation (highlighted by white arrows). This mild phenotype is suppressed entirely upon  $\Delta$ *pbp1a* deletion. *n* = 2, scale bar = 1 µm.

**b**, Expression of *wt* D39 *pbp1a* is lethal in R6 lacking CozE or MreC. The indicated *S. pneumoniae* strains were grown to exponential phase and normalised to an OD<sub>600</sub> of 0.2. Resulting cultures were serially diluted and 5 µl of each dilution spotted onto TSAII 5%SB plates in the presence or absence of 600 µM ZnCl<sub>2</sub>. Plates were incubated at 37°C in 5% CO<sub>2</sub> cabinet and imaged. Spot dilutions show P<sub>Zn</sub>::*pbp1a*<sup>D39</sup> 'wt' was lethal in the R6 background on induction, whereas P<sub>Zn</sub>::*pbp1a*<sup>R6</sup> and a glycosyltransferase P<sub>Zn</sub>::*pbp1a*(GT-) mutant was not lethal under the same conditions.

**Supplementary Figure 6 | Cells lacking both PBP1a and CozE or PBP1a and MreC have no growth or morphological defects.**

**a**, Representative images of *wt*,  $\Delta$ *pbp1a*,  $\Delta$ *pbp1a*  $\Delta$ *cozE* and  $\Delta$ *pbp1a*  $\Delta$ *mreC* deletion strains. In all cases strains were grown in THY at 37°C in a 5% CO<sub>2</sub> cabinet to mid-exponential phase. Cells were imaged on a THY 2% agarose pad, scale bar = 3 µm.

**b**, Control growth curves for all single/double deletion strains and strains containing the P<sub>Zn</sub>::*pbp1a* construct. All strains were grown in THY to mid-exponential phase, diluted in fresh THY to an OD<sub>600</sub> of 0.025 in the presence or absence of 600 µM ZnCl<sub>2</sub> and incubated at 37°C in a 5% CO<sub>2</sub> cabinet. OD<sub>600</sub> was recorded approximately every 30 min for 6 h.

**c**, CFU counts of  $\Delta$ *cozE* and  $\Delta$ *mreC* strains show no difference in strain viability on P<sub>Zn</sub>::*pbp1a* induction after 8 h. Cultures were diluted in fresh THY to an OD<sub>600</sub> of 0.025 in the presence or absence of 600 µM ZnCl<sub>2</sub> and incubated at 37°C in a 5% CO<sub>2</sub> cabinet. Viable counts are shown for the 6 h and 8 h post-induction time points and show no statistically significant differences. *n* = 3, error bars = standard deviation.

**d**, Representative images of  $\Delta$ *cozE*,  $\Delta$ *mreC* and  $\Delta$ *cozE*  $\Delta$ *mreC* strains containing the P<sub>Zn</sub>::*pbp1A* construct but without induction. Strains were grown in the same manner as the growth curves above (b). At indicated time points cells were removed and placed on a THY 2% agarose pad and immediately imaged. *n* = 2, scale bar = 3 µm. Images serve as the uninduced control of strains shown in **Fig 2b**.

**Supplementary Figure 7 | CozE and MreC are essential and show a lytic phenotype upon depletion.**

**a**, Depletion of MreC or CozE in *pbp1a*<sup>+</sup> strains. Deletion strains of the essential genes *cozE* or *mreC* were constructed in strain backgrounds supplying a second copy of the ORF ectopically from a fucose inducible promoter. Strains were streaked on TSAII 5%SB overlay plates containing either 0.4% fucose (+ Fucose) or 0.4% sucrose to repress the promoter (No induction) as indicated. Both native and gfp-tagged *cozE* and *mreC* ORFs are shown. Plates were incubated at 37°C in a 5% CO<sub>2</sub> cabinet and imaged

**b**, Aberrant fluorescent D-amino acid (TADA) incorporation in CozE and MreC depletion strains. Strains were grown to mid-exponential phase in THY containing 0.4% fucose, washed in THY and back diluted to an OD<sub>600</sub> of 0.025 in fresh THY without fucose. Cultures were incubated at 37°C in a 5% CO<sub>2</sub> cabinet for 3 h 45 min. TADA labelling was carried out for 15 min prior to imaging on 2% agarose pad. Scale bar = 1 µm. Phenotypes are similar to those resulting from P<sub>zn</sub>::*pbp1A* or P<sub>zn</sub>::*gfp-pbp1A* expression in  $\Delta$ *cozE* or  $\Delta$ *mreC* strains shown in **Fig. 2** and **Fig. 3**.

### **Supplementary Figure 8 | PBP1a-induced lethality in the absence of CozE or MreC does not require the activity of the major autolysins LytA or CbpD.**

**a**, The indicated *S. pneumoniae* strains were grown to mid-exponential phase and normalised to an OD<sub>600</sub> of 0.2. Resulting cultures were serially diluted and 5 µl of each dilution spotted onto TSAII 5%SB plates in the presence or absence of 600 µM ZnCl<sub>2</sub>. Plates were incubated at 37°C in a 5% CO<sub>2</sub> cabinet and imaged.

**b**,  $\Delta$ *cozE*,  $\Delta$ *mreC* strains lacking major autolysins lyse upon induction of *pbp1a* from a zinc inducible promoter. Strains containing a zinc inducible *pbp1a* construct were grown in THY to mid-exponential phase. Cultures were diluted in fresh THY to an OD<sub>600</sub> of 0.025 in the presence or absence of 600 µM ZnCl<sub>2</sub> and incubated at 37°C in a 5% CO<sub>2</sub> cabinet. Where necessary cultures were further back diluted at 2 h to avoid high cell densities. At 4 h post-induction cells were removed and placed on THY 2% agarose pad and immediately imaged. Two representative images for the induced condition are shown, scale bar = 3 µm. Uninduced cells have a morphology similar to *wt*, however cells expressing *pbp1a* show aberrant morphologies similar to those reported in **Fig. 2b**.

### **Supplementary Figure 9 | GFP-PBP1a fusion protein functionality assays.**

**a**, Inducing the P<sub>zn</sub>::*gfp-pbp1a* fusion can complement *pbp1a/pbp2a* synthetic lethality. The indicated *S. pneumoniae* strains were grown to exponential phase and normalised to an OD<sub>600</sub> of 0.2. Resulting cultures were serially diluted and 5 µl of each dilution spotted onto TSAII 5%SB plates in the presence or absence of 200 µM ZnCl<sub>2</sub>. Plates were incubated at 37°C in 5% CO<sub>2</sub> cabinet and imaged.

**b**, The growth rate of cells expressing the *gfp-pbp1a* fusion as the only essential class A PBP enzyme are indistinguishable from *wt*. Strains containing a zinc inducible *pbp1A* or *gfp-pbp1a* allele were grown in THY with 200 µM ZnCl<sub>2</sub> to mid-exponential phase. Cultures were diluted in fresh THY to an OD<sub>600</sub> of 0.025 in the presence or absence of 200 µM ZnCl<sub>2</sub> and incubated at 37°C in a 5% CO<sub>2</sub> cabinet. OD<sub>600</sub> were recorded approximately every 30 min for 6 h. A *wt* growth curve in the presence of 200 µM ZnCl<sub>2</sub> is shown for reference.

**c**, GFP-PBP1a is localized to mid-cell. Strains were grown to mid-exponential phase in THY 200  $\mu\text{M}$   $\text{ZnCl}_2$  at 37°C in a 5%  $\text{CO}_2$  cabinet to mid-exponential phase. Cells were labelled with TADA for 15 min prior to imaging on 2% agarose pads.  $n = 2$ , scale bar = 1  $\mu\text{m}$ .

### **Supplementary Figure 10 | GFP-PBP1a activity in the absence of CozE and MreC results in growth defects and delocalised PG synthesis.**

**a**, Growth curves for strains containing *gfp-pbp1a* constructs. Both *gfp* fused *pbp1a* wild type and catalytically inactive transpeptidase mutant constructs (TP-) were placed under the control of a zinc inducible promoter in  $\Delta\text{cozE}$  or  $\Delta\text{mreC}$  strain backgrounds. Strains were grown in THY to mid-exponential phase, diluted in fresh THY to an  $\text{OD}_{600}$  of 0.025 in the presence or absence of 600  $\mu\text{M}$   $\text{ZnCl}_2$  and incubated at 37°C in a 5%  $\text{CO}_2$  cabinet.  $\text{OD}_{600}$  was recorded approximately every 30 min for 6 h.

**b**, Immunoblot analysis of strains expressing *gfp-pbp1a* after 4 h of induction. Strains were grown to mid-exponential phase, back diluted to an  $\text{OD}_{600}$  of 0.025 in THY + 600  $\mu\text{M}$   $\text{ZnCl}_2$  and incubated at 37°C in a 5%  $\text{CO}_2$  cabinet for 4 h. Where necessary cultures were further back diluted at 2 h to avoid high cell densities and autolysis. Cells were sampled 4 h after induction, consistent with microscopy images shown in **Fig. 3b**. Cultures were normalised to an  $\text{OD}_{600}$  of 0.3 immediately before lysis. Cell lysates were used for immunoblots using either affinity-purified anti-GFP antibodies or an anti-FtsE antibody used as a loading control. Expected sizes of GFP-PBP1a = 107 kDa and FtsE = 26 kDa.

**c**, Glycosyltransferase defective GFP-PBP1a variants (GT-) are not retained at mid-cell in  $\Delta\text{cozE}$  or  $\Delta\text{mreC}$  strains but do not cause aberrant TADA incorporation similar to the transpeptidase mutant shown in **Fig. 3b**. Strains were grown to mid-exponential phase, back diluted to an  $\text{OD}_{600}$  of 0.025 in THY +600  $\mu\text{M}$   $\text{ZnCl}_2$  and incubated at 37°C in a 5%  $\text{CO}_2$  cabinet for 3 h 45 min. Where necessary cultures were further back diluted at 2 h to avoid high cell densities and autolysis. Cells were labelled with TADA for 15 min prior to imaging on 2% agarose pads.  $n = 2$ , scale bar = 1  $\mu\text{m}$ .

### **Supplementary Figure 11 | Demographs showing delocalised GFP-PBP1a and TADA signal at 4 h timepoints.**

Demographs show aberrant GFP-PBP1a localisation and TADA incorporation patterns in  $\Delta\text{cozE}$  and  $\Delta\text{mreC}$  strains upon induction of  $P_{\text{zn}}::\text{gfp-pbp1a}$ . Strains were grown to mid-exponential phase, back diluted to an  $\text{OD}_{600}$  of 0.025 in THY + 600  $\mu\text{M}$   $\text{ZnCl}_2$  and incubated at 37°C in a 5%  $\text{CO}_2$  cabinet for 3 h 45 min (and 5 h 45 min). Cells were labelled with TADA for 15 min prior to imaging on 2% agarose pads. Demographs shows normalised fluorescence signal profiles for single cells which have been integrated and collapsed to 1 pixel in width. Profiles are sorted by cell size and plotted. Demographs show delocalised GFP-PBP1a and

TADA labelling in  $\Delta\text{cozE}$  and  $\Delta\text{mreC}$  cells compared to a control strain. Delocalisation is more pronounced in  $\Delta\text{mreC}$  backgrounds compared to  $\Delta\text{cozE}$  at the 4 h timepoint verifying signal localisation quantifications shown in **Fig.3c**. However, signals continue to delocalise in the  $\Delta\text{cozE}$  backgrounds showing more severe delocalisation pattern at 6 h. Fluorescence profiles for 200 cells are shown in each demograph. Demographs were constructed using the open-source software package Oufiti<sup>3</sup>.

### **Supplementary Figure 12 | Untagged-PBP1a in the absence of CozE or MreC leads to delocalised TADA labelling.**

**a**, Aberrant TADA incorporation in  $\Delta\text{cozE}$  and  $\Delta\text{mreC}$  cells expressing untagged *pbp1a*. Strains were grown to mid-exponential phase, back diluted to an OD<sub>600</sub> of 0.025 in THY + 600  $\mu\text{M}$  ZnCl<sub>2</sub> and incubated at 37°C in a 5% CO<sub>2</sub> cabinet for 3 h 45 min. Where necessary cultures were further back diluted at 2 h to avoid high cell densities and autolysis. Cells were labelled with TADA for 15 min prior to imaging on 2% agarose pads. Two representative images for each strain are shown,  $n = 3$ , scale bar = 1  $\mu\text{m}$ . Delocalised TADA labelling patterns shown here are very similar to those reported for the  $\Delta\text{cozE}$  and  $\Delta\text{mreC}$  cells producing GFP-PBP1a variants in **Fig. 3b**. Examples of mid-cell and delocalised TADA signals in a  $\Delta\text{cozE}$  strain are highlighted with white and red arrows respectively.

**b**, Quantification for aberrant TADA incorporation patterns in  $\Delta\text{cozE}$  and  $\Delta\text{mreC}$  strains upon induction of P<sub>zn::</sub>*pbp1a*. Cultures were grown and treated exactly as described in **(a)**. Strains were imaged and scored at time 0, 30 min, 1 h, 2 h and 4 h post induction. For this analysis each *S. pneumoniae* cell in the joined diplococcus was scored as a single cell unit. Cells units were sorted into two categories: *wt* mid-cell localized signal and delocalised signal (examples of which are indicated by arrows in a). Graph shows the percentage of cells with delocalised TADA signal for  $\Delta\text{cozE}$  and  $\Delta\text{mreC}$  stains and two control strains. Greater than 700 cell units scored per data point,  $n = 2$ . Quantification of TADA incorporation patterns shown here are very similar to those reported in **Fig. 3c**.

**c**, The indicated *S. pneumoniae* strains were grown to exponential phase and normalised to an OD<sub>600</sub> of 0.2. Resulting cultures were serially diluted and 5  $\mu\text{l}$  of each dilution spotted onto TSAII 5%SB plates in the presence or absence of 600  $\mu\text{M}$  ZnCl<sub>2</sub>. Plates were incubated at 37°C in 5% CO<sub>2</sub> cabinet and imaged. Plates show PBP1a GT- and TP- variants are not lethal in  $\Delta\text{cozE}$  and  $\Delta\text{mreC}$  strains. These results are identical to those shown for the *gfp-pbp1a* mutants shown in **Fig. 3c**.

### **Supplementary Figure 13 | Mid-cell localisation of GFP-PBP2a in the absence of CozE and MreC.**

Strains were grown to mid-exponential phase, back diluted to an OD<sub>600</sub> of 0.025 in THY + 600  $\mu\text{M}$  ZnCl<sub>2</sub> and incubated at 37°C in a 5% CO<sub>2</sub> cabinet for 3 h 45 min. Where necessary cultures were further back diluted at 2 h to avoid high cell densities and autolysis. Cells were labelled with TADA for 15 min prior to imaging on 2% agarose pads.  $n = 2$ , scale bar = 1  $\mu\text{m}$ .

## Supplementary Figure 14 | Mid-cell localisation of GFP-CozE requires MreC

**a**, Midcell localisation of GFP-CozE and GFP-MreC is lost in double  $\Delta\text{cozE } \Delta\text{mreC}$  mutants. Strains were grown to mid-exponential phase in THY 0.4% fucose at 37°C in a 5% CO<sub>2</sub> cabinet. Cells were labelled with TADA for 15 min prior to imaging on 2% agarose pads. GFP-CozE and GFP-MreC localise at midcell to sites of active PG synthesis (suggested by the TADA labelling). In both cases localisation is lost in the double mutant: GFP-CozE forms delocalised spots at the cell periphery and GFP-MreC adopts a dispersed pattern which is typically more intense at one cell pole. GFP-CozE and GFP-MreC fusion proteins are functional as they suppress  $\Delta\text{cozE}$  and  $\Delta\text{mreC}$  essentiality (**Supplementary Fig. 7a**). Representative images for each strain are shown,  $n = 2$ , scale bar = 1  $\mu\text{m}$ .

**b**, Immunoblot analysis of strains expressing *gfp-cozE* and *gfp-mreC*. Strains were grown to mid-exponential phase in THY + 0.4% fucose and incubated at 37°C in a 5% CO<sub>2</sub> cabinet for 4-6 h. Cultures were normalised to an OD<sub>600</sub> of 0.3 immediately before lysis. Cell lysates were used for immunoblots using either affinity-purified anti-GFP antibodies or an anti-FtsE antibody used as a loading control. Expected molecular weight of GFP-CozE = 68 kDa and GFP-MreC = 56 kDa. Protein fusions are not degraded and expressed to the same level regardless of strain background, suggesting the aberrant localisation patterns observed in (**a**) are not due to partial degradation of the protein fusion.

## Supplementary Figure 15 | Bacterial two hybrid controls.

BTH101 *E. coli* cells containing plasmids expressing T18- and T25- protein fusions were grown to stationary phase in LB containing: Amp 50  $\mu\text{g ml}^{-1}$ , Kan 25  $\mu\text{g ml}^{-1}$  and IPTG 500  $\mu\text{g ml}^{-1}$ . 5  $\mu\text{l}$  of culture was spotted onto LB agar containing: Amp 50  $\mu\text{g ml}^{-1}$ , Kan 25  $\mu\text{g ml}^{-1}$  and X-gal 40  $\mu\text{g ml}^{-1}$ . Plates were incubated at 30°C and imaged. The terminus used for 'T25' or 'T18' protein fusion to *S. pneumoniae* proteins are shown in parenthesis, (N) = N-terminal or (C) = C-terminal.

**a**, Both DsbE and CcmF *E. coli* fusion proteins were labelled at the C-terminus. All fusion-proteins tested in this study are putative membrane proteins, therefore false positive signals could arise through artificial concentration of partner proteins constrained in space by the membrane. This control plate tests all protein fusions against two *E. coli* membrane protein fusions: DsbE, a transmembrane thiol:disulphide oxidoreductase enzyme and CcmF, a multi-pass inner membrane protein predicted to interact with DsbE (see diagram in **Fig. 15b**). No interaction is expected between these protein fusions and therefore they serve as a negative control for the bacterial two-hybrid results shown in **Fig. 4b**. However these proteins interact with each other showing both DsbE and CcmF fusion proteins are expressed in these cells.

**b**, Schematic of the DsbE and CcmF bacterial two hybrid negative controls. The output files of the Phobius web server were used to draw the schematic of the membrane topology of the control proteins used in (**a**). (<http://phobius.sbc.su.se/>).



**c**, Plates show bacterial two-hybrid interactions of CozE with known members of the PG biosynthetic complex. Plates show CozE fusions labelled at both termini with the class A PBP enzymes and MreCD proteins. Plates show every combination and serves as a control and additional verification of the two-hybrid data shown in **Fig. 4b**.

**d**, Plates show bacterial two hybrid interactions of MreCD with the synthetic lethal Class A PBP enzymes. Plates show every combination and serves as a control and additional verification of the two-hybrid data shown in **Fig. 4b**.

### **Supplementary Figure 16 | GFP-PBP1a, FLAG-CozE co-Immunoprecipitation controls.**

**a**, The  $P_{zn}::FLAG-cozE$  fusion can complement a *cozE* deletion in the presence of zinc. A *cozE* deletion strain was constructed in strain backgrounds expressing the *FLAG-cozE* fusion ectopically from a zinc inducible promoter. Strains were streaked on TSAII 5%SB overlay plates with either 200  $\mu$ M  $ZnCl_2$  or without (No Induction). Plates were incubated at 37°C in a 5%  $CO_2$  cabinet and imaged. Plates indicate the FLAG-CozE fusion protein is functional.

**b**, Antibody specificity tests on whole cell lysates used for co-immunoprecipitation experiments. Strains were grown to mid-exponential phase in THY + 400  $\mu$ M  $ZnCl_2$  and incubated at 37°C in a 5%  $CO_2$  cabinet for 4-6 h. Cultures were normalised to an  $OD_{600}$  of 0.3 immediately before lysis. Cell lysates were used for immunoblots using monoclonal anti-GFP antibody or anti-FLAG antibody. Expected molecular weight of GFP-PBP1a = 125 kDa and GFP-PBP2a = 108 kDa. The FLAG-CozE fusion runs at  $\approx$  30 kDa. The position of protein markers are indicated and non-specific bands are highlighted with an asterisk (\*). The position of protein markers are indicated by short marks to the right of the blot: 130 kDa and 100 kDa are shown in black and 35 kDa and 25 kDa are indicated in blue.

**c**, GFP-PBP1a interacts with FLAG-CozE in a co-immunoprecipitation assay. Indicated strains were grown and harvested in the presence of 400  $\mu$ M  $ZnCl_2$  and their membranes solubilised in 0.5% Digitonin. Solubilised membranes were passed over an anti-GFP sepharose resin and incubated for 4 h allowing the binding of the target GFP-fusion protein. The protein-bound resin was washed four times and bound proteins eluted in SDS-PAGE sample buffer. Proteins in complex with the GFP-fusion will be retained by the resin and therefore be detectable in the elution fraction. Fractions were analysed by immunoblot using monoclonal anti-GFP antibodies or monoclonal anti-FLAG antibodies. Analysis reveals PBP1a specifically pulls down CozE, as a FLAG-CozE fusion can be detected in the GFP-PBP1a co-IP elution but is not present in the GFP-PBP2a or PBP1a elution controls. The position of protein markers are indicated by short marks to the right of the blot: 130 kDa and 100 kDa are shown in black and 35 kDa and 25 kDa are indicated in blue.

### **Supplementary Table 1 | Raw Tn-seq analysis data for *wt* vs *pbp1a*.**

## Supplementary Methods

### *S. pneumoniae* strain construction

#### *S. pneumoniae* deletion strains

All *S. pneumoniae* deletion strains were generated using linear PCR fragments, similar to the method used by Robertson *et al*<sup>4</sup>. Two  $\approx$ 1 kb flanking regions of each gene were amplified and an antibiotic resistance marker placed between them using isothermal assembly<sup>5</sup>. Assembled PCR products were transformed directly into *S. pneumoniae* as described in the main text. In all cases, deletion primers were given the typical name: 'gene-designation'\_5FLANK\_F/R for 5' regions and 'gene-designation'\_3FLANK\_F/R for 3' regions, antibiotic markers were amplified from  $\Delta bgaA$  strains using the AntibioticMarker\_F/R primers (AKF\_Spn001-005). A full list of primer sequences can be found in the oligonucleotides table. Transformants were picked into 5 ml THY, grown to exponential phase and frozen without undergoing autolysis. Deletion strains had gDNA extracted and were confirmed by diagnostic PCR using the AntibioticMarker\_R primer in conjunction with a primer binding  $\approx$ 100 bp 5' of the disrupted gene; these primers were given the typical name: 'ORFdesignation'\_Seq\_F. Diagnostic PCRs gave  $\approx$ 2-2.5 kb PCR products, depending on the marker, which was not present in *wt* controls.

Confirmed gDNA preparations of single gene deletions were diluted to 20 ng  $\mu$ l<sup>-1</sup> and used for the construction of multiple knock out strains. For strains containing multiple deletions and construct integrations, transformants were verified by diagnostic re-streaking on media containing antibiotics. In special cases where more confidence was desirable, each construct was confirmed by diagnostic PCRs as described above.

#### Antibiotic-marked $\Delta bgaA$ strains

Strains containing a variety of antibiotic resistance cassettes inserted at the *bgaA* locus served as the source of all markers used in this study. In all cases cassettes were modified to make them compatible with amplification by the AntibioticMarker\_F and AntibioticMarker\_R primers. This has the advantage of all antibiotic markers being compatible with a single set of primers, which makes cloning and antibiotic marker replacement a simple process.

For construction of the *bgaA* PCR knock out constructs. The chloramphenicol resistance cassette was amplified from pAC1000<sup>6</sup> using primers: Chlor\_isoT\_F/R. The kanamycin and erythromycin resistance cassettes were amplified from pDR240 and pDR242 respectively, using primers: AntibioticMarker\_F/R. The spectinomycin resistance cassette was amplified from pMagellan6<sup>7</sup> using primers: Spec\_isoT\_F/R. Finally, the tetracycline resistance cassette was amplified from pJWV025<sup>8</sup> using primers: Tet\_isoT\_F/R. A 5' flanking region of *bgaA* and a 3' *bgaA* ORF fragment was amplified using primers: BgaA\_5FLANK\_F/R and BgaA\_3ORF\_F/R. Amplified *bgaA* fragments were combined with each resistance marker using isothermally assembly<sup>5</sup>, transformed into *S. pneumoniae* and selected on media containing the appropriate antibiotic. Integration of each resistance cassette at the *bgaA* locus was confirmed by diagnostic PCR using the *bgaA* flanking primer: *bgaA*\_FLANK\_F and AntibioticMarker\_R. Resulting strains were given the names AKF\_Spn001-005 (see Table below).

### **P<sub>zn</sub>::*pbp1a***

The P<sub>czc</sub> promoter<sup>9</sup>, henceforth known as P<sub>zn</sub>, was amplified from pJW025<sup>8</sup> using primers: oSP104 and oSp105. The *pbp1a* ORF was amplified from the D39 genome using oSp106 and oSp107 and added to the first fragment by isothermal assembly. The resulting construct was digested with BamHI and XhoI and ligated into pLEM019 cut with the same enzymes. This resulted in the plasmid pAKF201, which contains the *pbp1a* ORF under the control of a zinc-inducible promoter with a consensus RBS. This construct was integrated into the D39 genome at the *bgaA* site using flanking regions of homology present in the pLEM019 vector. The P<sub>zn</sub>::*pbp1a* construct was fully sequenced, linearized and transformed *into S. pneumoniae* for *bgaA* integration.

For *pbp1a* R6 expression (P<sub>zn</sub>::*pbp1a*<sup>R6</sup>) the P<sub>zn</sub> promoter was amplified from pJW025<sup>8</sup> with oSP104 and oSp105 and the *pbp1a* ORF was amplified from the R6 genome using oSp106 and oSp107. The resulting PCR products were combined by isothermal assembly, digested with BamHI and XhoI and ligated into pLEM019 cut with the same enzymes. The resulting construct (pLEM025) was fully sequenced and the two mutations (A370G and T1164G) confirmed.

### **P<sub>zn</sub>::*gfp-pbp1a***

The whole pAKF201 plasmid was amplified using primers: PBP1A\_GFP/YFP\_N\_3F2 and PBP1A\_GFP/YFP\_N\_5R. This introduced overlapping regions for isothermal assembly and a short linker sequence (coding: LEGPAEGL). The *gfp* ORF was amplified using primers: GFP/YFP\_N\_F and GFP/YFP\_N\_R from pUC57-*gfp*. The pUC57-*gfp* plasmid contains a de-novo synthesized *gfp* ORF, the sequence of which was originally from a *mut2 gfp* variant in pKL134<sup>10</sup> but contains additional mutations: S65A, V68L, S72A and A206K (for monomerisation), it has also been codon optimized for expression *S. pneumoniae*. These two fragments were combined by isothermal assembly, resulting in pAKF214. This plasmid was sequenced and transformed *into S. pneumoniae*. Specific integration into *bgaA* locus was confirmed by diagnostic PCR using the BgaA\_FLANK\_F primer.

### **Glycosyltransferase (GT-) and transpeptidase (TP-) defective *pbp1a* strains**

Catalytic glycosyltransferase residues (E91A and E150A) were identified by alignment to the putative active site residues of *E. coli* PBP1b, identified by Sung *et al* 2009<sup>11</sup>. The catalytic serine in the PBP1A transpeptidase domain was identified through the conserved motifs and information from the PBP1A the crystal structure<sup>12</sup>. In all cases, residues were mutagenized to a GCT alanine codon. P<sub>zn</sub>::*pbp1a*(GT-) was generated by two rounds of quick-change PCR, with primers: *pbp1a*\_E91A\_F/R and *pbp1a*\_E150\_F/R, resulting in pAKF213. P<sub>zn</sub>::*pbp1a*(TP-) was cloned with one round of quick-change PCR with primers: *pbp1a*\_S370A\_F/R, resulting in pAKF212. P<sub>zn</sub>::*gfp-pbp1a*(GT-) was cloned by digesting pAKF213 with SpeI and XhoI, generating a *pbp1a* fragment containing the TG- point mutations and insertion into pAKF214 cut with the same enzymes, resulting in pAKF223. P<sub>zn</sub>::*gfp-pbp1a*(TP-) was cloned by mutagenic PCR using primers: *pbp1a*\_S370A\_F/R, resulting in pAKF222. In all cases, point mutations were confirmed by sequencing. Plasmids were transformed *into S. pneumoniae* and specific integration into the *bga* locus confirmed by diagnostic PCR using the BgaA\_FLANK\_F primer.

### **P<sub>zn</sub>::*pbp2a***

The P<sub>zn</sub><sup>9</sup> promoter was amplified from pJW025<sup>8</sup> using primers: oSP104 and oSp105. The *pbp2a* ORF was amplified from the D39 genome using oSp108 and oSp109 and added to the first fragment by isothermal assembly. The resulting construct was digested with BamHI and XhoI and ligated into pLEM019 cut with the same enzymes. This resulted in the plasmid pAKF200, which contains the *pbp2a* ORF under the control of a zinc-inducible promoter with a consensus RBS. This construct was integrated into the D39 genome at the *bgaA* site using flanking regions of homology present in the pLEM019 vector. The P<sub>zn</sub>::*pbp2a* construct was fully sequenced, linearized and transformed *into S. pneumoniae* for *bgaA* integration.

### **P<sub>zn</sub>::*gfp-pbp2a***

The whole pAKF200 plasmid was amplified using primers: PBP2a\_GFP/YFP\_N\_F and PBP2a\_GFP/YFP\_N\_R. This introduced overlapping regions for isothermal assembly and a short linker sequence (coding: LEGPAEGL). The *gfp* ORF was amplified using primers: GFP/YFP\_N\_F and GFP/YFP\_N\_R from pUC57-*gfp*. The pUC57-*gfp* plasmid contains a de-novo synthesized *gfp* ORF, the sequence of which was originally from a *mut2 gfp* variant in pKL134<sup>10</sup> but contains additional mutations: S65A, V68L, S72A and A206K (for monomerisation), it has also been codon optimized for expression *S. pneumoniae*. These two fragments were combined by isothermal assembly, resulting in pAKF228. This plasmid was sequenced and transformed *into S. pneumoniae*. Specific integration into *bgaA* locus was confirmed by diagnostic PCR using the BgaA\_FLANK\_F primer.

### **P<sub>fucose</sub>::*cozE* and P<sub>fucose</sub>::*mreC***

The *cozE* ORF, with its native RBS, was amplified from the D39 genome using primers: SPD\_0768\_nativeRBS\_F and SPD\_0768\_R. Primers introduced XhoI and BamHI sites used to insert this fragment into pAKF205, resulting in pAKF208. To reduce *cozE* expression, pAKF208 was mutagenized to replace the ATG start codon to a TTG by quick-change PCR using primers: SPD\_0768\_TTG\_F/R, resulting in pAKF215. In both cases the full *cozE* ORF was sequenced. Plasmids were transformed *into S. pneumoniae* and specific integration into the *bga* locus was confirmed by diagnostic PCR using the BgaA\_FLANK\_F primer.

The *mreCD* ORFs, with its native RBS, were amplified from the D39 genome using primers: MreC\_nativeRBS\_F and MreD\_R. Primers introduced XhoI and BamHI sites used to insert into pAKF205, resulting in pAKF207. The *mreCD* insert was fully sequenced and the plasmid transformed *into S. pneumoniae*. Specific integration into the *bga* locus was confirmed by diagnostic PCR using the BgaA\_FLANK\_F primer.

### **P<sub>fucose</sub>::*gfp-cozE* and P<sub>fucose</sub>::*gfp-mreC***

P<sub>fucose</sub>::*gfp-cozE* was cloned by isothermal assembly. The pAKF208 plasmid was amplified using primers: SPD0768\_GFP/YFP\_N\_5R and SPD0768\_GFP/YFP\_N\_3F. This introduced overlapping regions for isothermal assembly and a short linker sequence (coding:

LEGPAEGL). The *gfp* ORF was amplified using primers: GFP/YFP\_N\_F and GFP/YFP\_N\_R from pUC57-*gfp*. These two fragments were combined by isothermal assembly, resulting in pAKF218. The  $P_{\text{fucose}}::\textit{gfp-cozE}$  construct was fully sequenced and transformed into *S. pneumoniae*. Site specific integration into the genome at *bgaA* was confirmed by diagnostic PCR using the BgaA\_FLANK\_F primer. To reduce basal expression, pAKF218 was mutagenized to replace the ATG start codon to a TTG by quick change PCR using primers: GFP\_TTG\_F/R, resulting in pAKF221. The TTG mutation was sequenced and the plasmid transformed into *S. pneumoniae*.

$P_{\text{fucose}}::\textit{gfp-mreC}$  was cloned by isothermal assembly. The pAKF207 plasmid was PCR amplified using primers: MreC\_GFP/YFP\_N\_5R and MreC\_GFP/YFP\_N\_3F. This introduced overlapping regions for isothermal assembly and a short linker sequence (coding: LEGPAEGL). The *gfp* ORF was amplified using primers: GFP/YFP\_N\_F and GFP/YFP\_N\_R from pUC57-*gfp*. These two fragments were combined by isothermal assembly, resulting in pAKF217. The  $P_{\text{fucose}}::\textit{gfp-mreC}$  construct was fully sequenced and transformed into *S. pneumoniae*. Site specific integration into the genome was confirmed by diagnostic PCR using the BgaA\_FLANK\_F primer.

### **$P_{\text{zn}}::\textit{FLAG-cozE}$**

The triple *FLAG-cozE* fusion construct was generated by isothermal assembly. The SPD0768 ORF was amplified using primers: SPD0768\_FLAG\_N\_F and SPD0768\_FLAG\_Pzn\_R. These primers amplified the SPD0768 ORF (removing the start codon), added a linker (encoding: LEGPAEGL) and added part of the FLAG tag. The second fragment was amplified from the D39  $\Delta\textit{cps}$  genome using primers: SPD0768\_5FLANK\_F and SPD0768\_FLAG\_N\_R. These primers introduced the remaining FLAG tag sequence. The two PCR fragments were combined by isothermal assembly. The resulting reaction was further amplified using primers: SPD0768\_FLAG\_Pzn\_F and SPD0768\_FLAG\_Pzn\_R. Primers introduced XhoI and BamHI sites used to insert into pLEM023 cut with the same enzymes. The resulting plasmid (pAKF227) contained the codon optimized triple FLAG tag -*cozE* fusion under the control of the  $P_{\text{zn}}$  promoter with its native RBS.

For expression of the two protein-fusions used in immunoprecipitation assays we generated a strain in which the  $P_{\text{zn}}::\textit{FLAG-cozE}$  construct was placed at the *cozE* native locus (AKF\_Spn\_638). A four piece isothermal assembly was carried out consisting of a 5'-SPD0768-flanking region,  $P_{\text{zn}}::\textit{FLAG-SPD0768}$ , SpecR cassette, and 3'-0768-flanking region. The flanking regions were amplified from the D39  $\Delta\textit{cps}$  genome using primers: SPD0768\_5FLANK\_F, SPD0768\_5FLANK\_insert\_R, SPD0768\_3FLANK\_F and SPD0768\_3FLANK\_R as appropriate. The  $P_{\text{zn}}::\textit{FLAG-SPD0768}$  construct was amplified from pAKF227 using primers: pLEM023\_F and pLEM023\_R. Finally, the Spectinomycin resistance cassette from AKF\_Spn002 gDNA using primers: AntibioticMarker\_F and AntibioticMarker\_R. The resulting assembled construct was transformed into strain AKF\_Spn277 ( $\Delta\textit{SPD0768}::\textit{erm}$ ) and transformants selected on TSAII spec plates. Replacement of the *erm* resistance marker with the spectinomycin marker was screened by patching candidates on TSAII *erm* plates. The resulting strain (AKF\_Spn638) was confirmed by diagnostic PCR and sequencing using FLAG\_Seq\_F primer. In addition a diagnostic Western blot was carried out to confirm expression.

## Plasmid construction

### pLEM019

One 5' flanking region of *bgaA* and a 3' ORF fragment of *bgaA* were cloned sequentially either side of a multiple cloning site (MCS). A tetracycline resistance cassette was introduced between *bgaA* regions, using a BamHI/Sall fragment of pJWV025<sup>8</sup> and ligation between *bgaA* regions using BglII/Sall sites. The resulting plasmid is an ectopic integration construct for integrating constructs at the *bgaA* locus in *S. pneumoniae*. Integration into the *S. pneumoniae* genome can be confirmed using the flanking primers: *bgaA\_FLANK\_F* and *bgaA\_FLANK\_R*.

### pLEM023

The zinc-inducible promoter ( $P_{\text{czcD}}$ )<sup>9</sup> was amplified from pJWV025<sup>8</sup> using primers: oSp00X and oSp00Y. Primers introduced EcoRI and XhoI sites used to insertion into pLEM019 cut with the same enzymes. The resulting plasmid is an ectopic integration construct for placing ORFs under the control of a zinc inducible promoter and integrating them at the *bgaA* locus in *S. pneumoniae*. Integration into the *S. pneumoniae* genome can be confirmed using the flanking primers: *bgaA\_FLANK\_F* and *bgaA\_FLANK\_R*.

### pAKF205

The  $P_{\text{fucK}}$  promoter characterized by Chan *et al* was amplified from the D39 genome using primers: P\_fucose\_F4, P\_fucose\_R4<sup>13</sup>. Primers introduced EcoRI and XhoI sites which were used for insertion into pLEM019 cut with the same enzymes (required partial digestion). The resulting plasmid is an ectopic integration construct for placing ORFs under the control of a fucose inducible promoter, henceforth known as  $P_{\text{fucose}}$ , and integrating them at the *bgaA* locus in *S. pneumoniae*.

## Bacterial Two hybrid plasmids

In all cases, bacterial two-hybrid primers were given the typical name: 'gene-designation'\_BTH\_N\_F/R for N-terminal fusions and 'gene-designation'\_BTH\_C\_F/R for C-terminal fusions. For N-terminal fusions, primers introduced XbaI sites and EcoRI for cloning into the two-hybrid vectors pKT25 and pUT18 digested with the same enzymes. For *pbp1a*, *pbp2a* and *mreC* XbaI and XmaI sites were used due to internal EcoRI site(s) in these ORFs. For C-terminal fusions primers introduced HindIII and BamHI sites for insertion into two hybrid vectors: pKNT25 and pUT18 cut with the same enzymes. All ORFs were fully sequenced before use in the two-hybrid assay.

### ***S. pneumoniae* strains used in this study**

| <b>Strain Name</b>      | <b>Genotype</b>                                                                                                                                   | <b>Resistance Marker(s)</b> | <b>Source or Reference</b> |
|-------------------------|---------------------------------------------------------------------------------------------------------------------------------------------------|-----------------------------|----------------------------|
| D39                     | [Type Strain]                                                                                                                                     | -                           | 14                         |
| D39 $\Delta$ <i>cps</i> | $\Delta$ <i>cps2A'</i> - $\Delta$ <i>cps2H'</i> [Wild Type]                                                                                       | -                           | 14                         |
| R6                      | non-pathogenic domesticated laboratory strain, derivative of D39                                                                                  | -                           | 14–16<br>Vernet Lab        |
| AKF_Spn001              | $\Delta$ <i>bgaA::kan</i>                                                                                                                         | Kan                         | This Study                 |
| AKF_Spn002              | $\Delta$ <i>bgaA::add9(spec)</i>                                                                                                                  | Spec                        | This Study                 |
| AKF_Spn003              | $\Delta$ <i>bgaA::tetM(tet)</i>                                                                                                                   | Tet                         | This Study                 |
| AKF_Spn004              | $\Delta$ <i>bgaA::cat</i>                                                                                                                         | Cam                         | This Study                 |
| AKF_Spn005              | $\Delta$ <i>bgaA::erm</i>                                                                                                                         | Erm                         | This Study                 |
| AKF_Spn009              | $\Delta$ <i>pbp1a::kan</i>                                                                                                                        | Kan                         | This Study                 |
| AKF_Spn011              | $\Delta$ <i>pbp2a::erm</i>                                                                                                                        | Erm                         | This Study                 |
| AKF_Spn042              | $\Delta$ <i>pbp1a::kan</i> $\Delta$ <i>cozE::spec</i>                                                                                             | Kan, Spec                   | This Study                 |
| AKF_Spn277              | $\Delta$ <i>pbp1a::kan</i> $\Delta$ <i>cozE::erm</i>                                                                                              | Kan,                        | This Study                 |
| AKF_Spn040              | $\Delta$ <i>pbp1a::kan</i> $\Delta$ <i>mreC::spec</i>                                                                                             | Kan, Spec                   | This Study                 |
| AKF_Spn075              | $\Delta$ <i>pbp1a::kan</i> $\Delta$ <i>mreD::spec</i>                                                                                             | Kan, Spec                   | This Study                 |
| AKF_Spn388              | $\Delta$ <i>pbp1a::kan</i> $\Delta$ <i>mreCD::spec</i>                                                                                            | Kan, Spec                   | This Study                 |
| AKF_Spn279              | $\Delta$ <i>pbp1a::kan</i> $\Delta$ <i>mreC::spec</i> $\Delta$ <i>cozE::erm</i>                                                                   | Kan, Spec, Erm              | This Study                 |
| AKF_Spn024              | $\Delta$ <i>bgaA::</i> (P <sub>zn</sub> :: <i>pbp1a, tet</i> )                                                                                    | Tet                         | This Study                 |
| AKF_Spn036              | $\Delta$ <i>pbp1a::kan</i> $\Delta$ <i>bgaA::</i> (P <sub>zn</sub> :: <i>pbp1a, tet</i> )                                                         | Kan, Tet                    | This Study                 |
| AKF_Spn343              | $\Delta$ <i>pbp1a::kan</i> $\Delta$ <i>mreC::spec</i><br>$\Delta$ <i>bgaA::</i> (P <sub>zn</sub> :: <i>pbp1a, tet</i> )                           | Kan, Spec, Tet              | This Study                 |
| AKF_Spn346              | $\Delta$ <i>pbp1a::kan</i> $\Delta$ <i>cozE::spec</i><br>$\Delta$ <i>bgaA::</i> (P <sub>zn</sub> :: <i>pbp1a, tet</i> )                           | Kan, Spec, Tet              | This Study                 |
| AKF_Spn412              | $\Delta$ <i>pbp1a::kan</i> $\Delta$ <i>mreC::spec</i> $\Delta$ <i>cozE::erm</i><br>$\Delta$ <i>bgaA::</i> (P <sub>zn</sub> :: <i>pbp1a, tet</i> ) | Kan, Spec, Erm,<br>Tet      | This Study                 |
| AKF_Spn082              | $\Delta$ <i>pbp1a::kan</i> $\Delta$ <i>mreD::spec</i><br>$\Delta$ <i>bgaA::</i> (P <sub>zn</sub> :: <i>pbp1a, tet</i> )                           | Kan, Spec, Tet              | This Study                 |
| AKF_Spn396              | $\Delta$ <i>pbp1a::kan</i> $\Delta$ <i>mreCD::spec</i><br>$\Delta$ <i>bgaA::</i> (P <sub>zn</sub> :: <i>pbp1a, tet</i> )                          | Kan, Spec, Tet              | This Study                 |

***S. pneumoniae* strains used in this study (continued)**

| Strain Name | Genotype                                                                                                                                                                                 | Resistance Marker(s) | Source or Reference |
|-------------|------------------------------------------------------------------------------------------------------------------------------------------------------------------------------------------|----------------------|---------------------|
| AKF_Spn538  | R6: $\Delta\text{cozE}::\text{spec}$                                                                                                                                                     | Spec,                | This Study          |
| AKF_Spn540  | R6: $\Delta\text{mreC}::\text{spec}$                                                                                                                                                     | Spec,                | This Study          |
| AKF_Spn534  | R6: $\Delta\text{pbp1a}::\text{kan } \Delta\text{cozE}::\text{spec}$                                                                                                                     | Kan, Spec,           | This Study          |
| AKF_Spn542  | R6: $\Delta\text{pbp1a}::\text{kan } \Delta\text{mreC}::\text{spec}$                                                                                                                     | Kan, Spec,           | This Study          |
| AKF_Spn550  | R6: $\Delta\text{pbp1a}::\text{kan } \Delta\text{cozE}::\text{spec}$<br>$\Delta\text{bgaA}::(\text{P}_{\text{zn}}::\text{pbp1a}, \text{tet})$                                            | Kan, Spec, Tet       | This Study          |
| AKF_Spn548  | R6: $\Delta\text{pbp1a}::\text{kan } \Delta\text{cozE}::\text{spec}$<br>$\Delta\text{bgaA}::(\text{P}_{\text{zn}}::\text{gfp-pbp1a}(\text{E91A}, \text{E150A})[\text{GT-}], \text{tet})$ | Kan, Spec, Tet       | This Study          |
| AKF_Spn596  | R6: $\Delta\text{pbp1a}::\text{kan } \Delta\text{cozE}::\text{spec}$<br>$\Delta\text{bgaA}::(\text{P}_{\text{zn}}::\text{pbp1a}^{\text{R6}}, \text{tet})$                                | Kan, Spec, Tet       | This Study          |
| AKF_Spn552  | R6: $\Delta\text{pbp1a}::\text{kan } \Delta\text{mreC}::\text{spec}$<br>$\Delta\text{bgaA}::(\text{P}_{\text{zn}}::\text{pbp1a}, \text{tet})$                                            | Kan, Spec, Tet       | This Study          |
| AKF_Spn554  | R6: $\Delta\text{pbp1a}::\text{kan } \Delta\text{mreC}::\text{spec}$<br>$\Delta\text{bgaA}::(\text{P}_{\text{zn}}::\text{gfp-pbp1a}(\text{E91A}, \text{E150A})[\text{GT-}], \text{tet})$ | Kan, Spec, Tet       | This Study          |
| AKF_Spn556  | R6: $\Delta\text{pbp1a}::\text{kan } \Delta\text{mreC}::\text{spec}$<br>$\Delta\text{bgaA}::(\text{P}_{\text{zn}}::\text{pbp1a}^{\text{R6}}, \text{tet})$                                | Kan, Spec, Tet       | This Study          |
| AKF_Spn391  | $\Delta\text{bgaA}::(\text{P}_{\text{zn}}::\text{gfp-pbp1a}, \text{tet})$                                                                                                                | Tet                  | This Study          |
| AKF_Spn452  | $\Delta\text{pbp1a}::\text{kan } \Delta\text{bgaA}::(\text{P}_{\text{zn}}::\text{gfp-pbp1a}, \text{tet})$                                                                                | Kan, Tet             | This Study          |
| AKF_Spn400  | $\Delta\text{pbp1a}::\text{kan } \Delta\text{cozE}::\text{spec}$<br>$\Delta\text{bgaA}::(\text{P}_{\text{zn}}::\text{gfp-pbp1a}, \text{tet})$                                            | Kan, Spec, Tet       | This Study          |
| AKF_Spn393  | $\Delta\text{pbp1a}::\text{kan } \Delta\text{mreC}::\text{spec}$<br>$\Delta\text{bgaA}::(\text{P}_{\text{zn}}::\text{gfp-pbp1a}, \text{tet})$                                            | Kan, Spec, Tet       | This Study          |



***S. pneumoniae* strains used in this study (continued)**

| Strain Name | Genotype                                                                                           | Resistance Marker(s) | Source or Reference |
|-------------|----------------------------------------------------------------------------------------------------|----------------------|---------------------|
| AKF_Spn482A | $\Delta pbp1a::kan$<br>$\Delta bgaA::(P_{zn}::gfp-pbp1a(E91A, E150A)[GT-], tet)$                   | Kan, Tet             | This Study          |
| AKF_Spn486  | $\Delta pbp1a::kan \Delta coxE::spec$<br>$\Delta bgaA::(P_{zn}::gfp-pbp1a(E91A, E150A)[GT-], tet)$ | Kan, Spec, Tet       | This Study          |
| AKF_Spn484  | $\Delta pbp1a::kan \Delta mreC::spec$<br>$\Delta bgaA::(P_{zn}::gfp-pbp1a(E91A, E150A)[GT-], tet)$ | Kan, Spec, Tet       | This Study          |
| AKF_Spn480A | $\Delta pbp1a::kan$<br>$\Delta bgaA::(P_{zn}::gfp-pbp1a(S370A) [TP-], tet)$                        | Kan, Tet             | This Study          |
| AKF_Spn477  | $\Delta pbp1a::kan \Delta coxE::spec$<br>$\Delta bgaA::(P_{zn}::gfp-pbp1a(S370A) [TP-], tet)$      | Kan, Spec, Tet       | This Study          |
| AKF_Spn479  | $\Delta pbp1a::kan \Delta mreC::spec$<br>$\Delta bgaA::(P_{zn}::gfp-pbp1a(S370A) [TP-], tet)$      | Kan, Spec, Tet       | This Study          |
| AKF_Spn367  | $\Delta pbp1a::kan \Delta coxE::spec$<br>$\Delta bgaA::(P_{zn}::pbp1a(E91A, E150A)[GT-], tet)$     | Kan, Spec, Tet       | This Study          |
| AKF_Spn359  | $\Delta pbp1a::kan \Delta mreC::spec$<br>$\Delta bgaA::(P_{zn}::pbp1a(E91A, E150A)[GT-], tet)$     | Kan, Spec, Tet       | This Study          |
| AKF_Spn365  | $\Delta pbp1a::kan \Delta coxE::spec$<br>$\Delta bgaA::(P_{zn}::pbp1a(S370A) [TP-], tet)$          | Kan, Spec, Tet       | This Study          |
| AKF_Spn357  | $\Delta pbp1a::kan \Delta mreC::spec$<br>$\Delta bgaA::(P_{zn}::pbp1a(S370A) [TP-], tet)$          | Kan, Spec, Tet       | This Study          |
| AKF_Spn641  | $\Delta pbp1a::kan$<br>$\Delta bgaA::(P_{zn}::gfp-pbp2a, tet)$                                     | Kan, Spec, Tet       | This Study          |
| AKF_Spn643  | $\Delta pbp1a::kan \Delta coxE::spec$<br>$\Delta bgaA::(P_{zn}::gfp-pbp2a, tet)$                   | Kan, Spec, Tet       | This Study          |

***S. pneumoniae* strains used in this study (continued)**

| <b>Strain Name</b> | <b>Genotype</b>                                                                         | <b>Resistance Marker(s)</b> | <b>Source or Reference</b> |
|--------------------|-----------------------------------------------------------------------------------------|-----------------------------|----------------------------|
| AKF_Spn645         | <i>Δpbp1a::kan ΔmreC::spec</i><br><i>ΔbgaA::(P<sub>Zn</sub>::gfp-pbp2a, tet)</i>        | Kan, Spec, Tet              | This Study                 |
| AKF_Spn402         | <i>ΔbgaA::(P<sub>fucose</sub>::cozE, tet)</i>                                           | Tet                         | This Study                 |
| AKF_Spn408         | <i>ΔbgaA::(P<sub>fucose</sub>::gfp-cozE, tet)</i>                                       | Tet                         | This Study                 |
| AKF_Spn283         | <i>ΔbgaA::(P<sub>fucose</sub>::mreC, tet)</i>                                           | Tet                         | This Study                 |
| AKF_Spn406         | <i>ΔbgaA::(P<sub>fucose</sub>::gfp-mreC, tet)</i>                                       | Tet                         | This Study                 |
| AKF_Spn296         | <i>ΔmreC::spec</i><br><i>ΔbgaA::(P<sub>fucose</sub>::mreC, tet)</i>                     | Spec, Tet                   | This Study                 |
| AKF_Spn328         | <i>ΔmreC::spec</i><br><i>ΔbgaA::(P<sub>fucose</sub>::gfp-mreC, tet)</i>                 | Spec, Tet                   | This Study                 |
| AKF_Spn422         | <i>ΔcozE::spec</i><br><i>ΔbgaA::(P<sub>fucose</sub>::cozE, tet)</i>                     | Spec, Tet                   | This Study                 |
| AKF_Spn442         | <i>ΔcozE::spec</i><br><i>ΔbgaA::(P<sub>fucose</sub>::gfp-cozE, tet)</i>                 | Spec, Tet                   | This Study                 |
| AKF_Spn351         | <i>ΔlytA::cat</i>                                                                       | Tet                         | This Study                 |
| AKF_Spn385         | <i>Δpbp1a::kan ΔmreC::Spec ΔlytA::cat</i><br><i>ΔbgaA::(P<sub>Zn</sub>::pbp1a, tet)</i> | Kan, Erm, Tet,<br>Spec, Cam | This Study                 |
| AKF_Spn446         | <i>Δpbp1a::kan ΔcozE::Spec ΔlytA::cat</i><br><i>ΔbgaA::(P<sub>Zn</sub>::pbp1a, tet)</i> | Kan, Erm, Tet,<br>Spec, Cam | This Study                 |
| AKF_Spn382         | <i>ΔcbpD::cat</i>                                                                       | Tet                         | This Study                 |
| AKF_Spn410         | <i>Δpbp1a::kan ΔmreC::Spec ΔcbpD::cat</i><br><i>ΔbgaA::(P<sub>Zn</sub>::pbp1a, tet)</i> | Kan, Erm, Tet,<br>Spec, Cam | This Study                 |
| AKF_Spn448         | <i>Δpbp1a::kan ΔmreC::Spec ΔcbpD::cat</i><br><i>ΔbgaA::(P<sub>Zn</sub>::pbp1a, tet)</i> | Kan, Erm, Tet,<br>Spec, Cam | This Study                 |

***S. pneumoniae* strains used in this study (continued)**

| Strain Name | Genotype                                                                                                       | Resistance Marker(s) | Source or Reference |
|-------------|----------------------------------------------------------------------------------------------------------------|----------------------|---------------------|
| AKF_Spn638  | $\Delta pbp1a::kan$<br>$\Delta cozE::(P_{zn}::FLAG(3X)-cozE, spec)$                                            | Kan, Spec            | This Study          |
| AKF_Spn_653 | $\Delta pbp1a::kan$<br>$\Delta cozE::(P_{zn}::FLAG(3X)-cozE, spec)$<br>$\Delta bgaA::(P_{zn}::gfp-pbp1a, tet)$ | Kan, Spec, Tet       | This Study          |
| AKF_Spn_655 | $\Delta pbp1a::kan$<br>$\Delta cozE::(P_{zn}::FLAG(3X)-cozE, spec)$<br>$\Delta bgaA::(P_{zn}::gfp-pbp2a, tet)$ | Kan, Spec, Tet       | This Study          |
| AKF_Spn_664 | $\Delta pbp1a::kan$<br>$\Delta cozE::(P_{zn}::FLAG(3X)-cozE, spec)$<br>$\Delta bgaA::(P_{zn}::pbp1a, tet)$     | Kan, Spec, Tet       | This Study          |

The D39  $\Delta cps$  genotype ( $\Delta cps2A'-\Delta cps2H'$ ) was excluded from derivative strains for clarity. Strains are ordered as introduced in the manuscript. Cam = chloramphenicol, Erm = erythromycin, Kan = kanamycin, Spec = spectinomycin, Tet = tetracycline. [GT-] and [TP-] denote putative *pbp1a* constructs lacking either glycosyltransferase or transpeptidase activity respectively.

### ***E. coli* strains used in this study**

| <b>Strain Name</b> | <b>Genotype</b>                                                                                                                                                                                                             | <b>Resistance Marker(s)</b> | <b>Source or Reference</b> |
|--------------------|-----------------------------------------------------------------------------------------------------------------------------------------------------------------------------------------------------------------------------|-----------------------------|----------------------------|
| BTH101             | F- <i>cya</i> -99 <i>araD</i> 139 <i>galE</i> 15 <i>galK</i> 16 <i>rpsL</i> 1<br><i>hsdR</i> 2 <i>mcrA</i> 1 <i>mcrB</i> 1                                                                                                  | -                           | Euromedex                  |
| DH5 $\alpha$       | F- <i>hsdR</i> 17, $\Delta$ ( <i>argF-lacZ</i> )U169 <i>phoA</i> <i>glnV</i> 44<br>$\Phi$ 80 <i>dlacZ</i> $\Delta$ M15 <i>gyrA</i> 96 <i>recA</i> 1 <i>relA</i> 1 <i>endA</i> 1<br><i>thi</i> -1 <i>supE</i> 44 <i>deoR</i> | -                           | Gibco BRL                  |

### **Plasmids used in this study**

| <b>Name</b> | <b>Genotype</b>                                                                                                     | <b>Replicon</b> | <b>Resistance Marker(s)</b> | <b>Source or Reference</b> |
|-------------|---------------------------------------------------------------------------------------------------------------------|-----------------|-----------------------------|----------------------------|
| pAC1000     | 5' malP::rlrA::cat::malM                                                                                            | pBR322          | Cat                         | <sup>6</sup>               |
| pAKF200     | <i>bgaA</i> '::P <sub>zn</sub> :: <i>pbp2a</i> :: <i>tet</i> :: <i>bgaA</i> ' <i>bla</i>                            | pACYC           | Tet, Amp                    | This study                 |
| pAKF201     | <i>bgaA</i> '::P <sub>zn</sub> :: <i>pbp1a</i> :: <i>tet</i> :: <i>bgaA</i> ' <i>bla</i>                            | pACYC           | Tet, Amp                    | This study                 |
| pAKF205     | <i>bgaA</i> '::P <sub>fucose</sub> :: <i>tetM</i> :: <i>bgaA</i> ' <i>bla</i>                                       | pACYC           | Tet, Amp                    | This study                 |
| pAKF207     | <i>bgaA</i> '::P <sub>fucose</sub> :: <i>mreCD</i> :: <i>tetM</i> :: <i>bgaA</i> '<br><i>bla</i>                    | pACYC           | Tet, Amp                    | This study                 |
| pAKF208     | <i>bgaA</i> '::P <sub>fucose</sub> :: <i>cozE</i> :: <i>tetM</i> :: <i>bgaA</i> '<br><i>bla</i>                     | pACYC           | Tet, Amp                    | This study                 |
| pAKF212     | <i>bgaA</i> '::P <sub>zn</sub> :: <i>pbp1a</i> (S370A):: <i>tet</i> :: <i>bgaA</i> '<br><i>bla</i>                  | pACYC           | Tet, Amp                    | This study                 |
| pAKF213     | <i>bgaA</i> '::P <sub>zn</sub> :: <i>pbp1a</i> (E91A,<br>E150A):: <i>tet</i> :: <i>bgaA</i> ' <i>bla</i>            | pACYC           | Tet, Amp                    | This study                 |
| pAKF214     | <i>bgaA</i> '::P <sub>zn</sub> :: <i>gfp</i> :: <i>pbp1a</i> :: <i>tet</i> :: <i>bgaA</i> '<br><i>bla</i>           | pACYC           | Tet, Amp                    | This study                 |
| pAKF215     | <i>bgaA</i> '::P <sub>fucose</sub> ::'TTG'-<br><i>cozE</i> :: <i>tetM</i> :: <i>bgaA</i> ' <i>bla</i>               | pACYC           | Tet, Amp                    | This study                 |
| pAKF217     | <i>bgaA</i> '::P <sub>fucose</sub> :: <i>gfp</i> :: <i>mreCD</i> :: <i>tetM</i> :: <i>bgaA</i> '<br><i>bla</i>      | pACYC           | Tet, Amp                    | This study                 |
| pAKF218     | <i>bgaA</i> '::P <sub>fucose</sub> :: <i>gfp</i> :: <i>cozE</i> :: <i>tetM</i> :: <i>bgaA</i> '<br><i>bla</i>       | pACYC           | Tet, Amp                    | This study                 |
| pAKF221     | <i>bgaA</i> '::P <sub>fucose</sub> ::'TTG'-<br><i>gfp</i> :: <i>cozE</i> :: <i>tetM</i> :: <i>bgaA</i> ' <i>bla</i> | pACYC           | Tet, Amp                    | This study                 |

### Plasmids used in this study (*continued*)

| Name                | Genotype                                                                                                                                                | Replicon | Resistance Marker(s) | Source or Reference     |
|---------------------|---------------------------------------------------------------------------------------------------------------------------------------------------------|----------|----------------------|-------------------------|
| pAKF222             | <i>bgaA'</i> ::P <sub>zn</sub> :: <i>gfp</i> :: <i>pbp1a</i> (S370A):: <i>tet</i> :: <i>bgaA'</i> <i>bla</i>                                            | pACYC    | Tet, Amp             | This study              |
| pAKF223             | <i>bgaA'</i> ::P <sub>zn</sub> :: <i>gfp</i> :: <i>pbp1a</i> (E91A, E150A):: <i>tet</i> :: <i>bgaA'</i> <i>bla</i>                                      | pACYC    | Tet, Amp             | This study              |
| pAKF227             | <i>bgaA'</i> ::P <sub>zn</sub> :: <i>FLAG-cozE</i> :: <i>tet</i> :: <i>bgaA'</i> <i>bla</i>                                                             | pACYC    | Tet, Amp             | This study              |
| pAKF228             | <i>bgaA'</i> ::P <sub>zn</sub> :: <i>gfp-pbp2a</i> :: <i>tet</i> :: <i>bgaA'</i> <i>bla</i>                                                             | pACYC    | Tet, Amp             | This study              |
| pDR240              | <i>cwIH</i> ::P <sub>amiA</sub> :: <i>kan</i> :: <i>yqeD</i> , <i>bla</i><br>(Janus cassette <sup>17</sup> is the original source of <i>kan</i> marker) | pACYC    | Kan, Amp             | Cloned by Harvey Kimsey |
| pDR242              | <i>cwIH</i> ::P <sub>pe</sub> :: <i>erm</i> :: <i>yqeD</i> <i>bla</i>                                                                                   | pACYC    | Erm, Amp             | Cloned by Harvey Kimsey |
| pJWV025             | <i>bgaA'</i> ::P <sub>czc</sub> :: <i>gfp</i> , <i>tetM</i> :: <i>spr0564'</i> <i>bla</i>                                                               | pBR322   | Tet, Amp             | <sup>8</sup>            |
| pKNT25              | P <sub>lac</sub> ::- <i>T25</i> , <i>kan</i>                                                                                                            | pACYC    | Kan                  | <sup>18</sup>           |
| pKNT25- <i>mreD</i> | P <sub>lac</sub> :: <i>mreD</i> ( <i>S.pn</i> )- <i>T25</i> <i>kan</i>                                                                                  | pACYC    | Kan                  | This study              |
| pKNT25- <i>ccmF</i> | P <sub>lac</sub> :: <i>ccmF</i> - <i>T25</i> <i>kan</i>                                                                                                 | pACYC    | Kan                  | This study              |
| pKNT25- <i>cozE</i> | P <sub>lac</sub> :: <i>cozE</i> ( <i>spd0768</i> )- <i>T25</i> <i>kan</i>                                                                               | pACYC    | Kan                  | This study              |
| pKT25               | P <sub>lac</sub> :: <i>T25</i> - <i>kan</i>                                                                                                             | pACYC    | Kan                  | <sup>18</sup>           |
| pKT25- <i>mreC</i>  | P <sub>lac</sub> :: <i>T25-mreC</i> ( <i>S.pn</i> ) <i>kan</i>                                                                                          | pACYC    | Kan                  | This study              |
| pKT25- <i>mreD</i>  | P <sub>lac</sub> :: <i>T25-mreD</i> ( <i>S.pn</i> ) <i>kan</i>                                                                                          | pACYC    | Kan                  | This study              |
| pKT25- <i>pbp1a</i> | P <sub>lac</sub> :: <i>T25-pbp1a</i> ( <i>S.pn</i> ) <i>kan</i>                                                                                         | pACYC    | Kan                  | This study              |
| pKT25- <i>pbp2a</i> | P <sub>lac</sub> :: <i>T25-pbp2a</i> ( <i>S.pn</i> ) <i>kan</i>                                                                                         | pACYC    | Kan                  | This study              |
| pKT25- <i>cozE</i>  | P <sub>lac</sub> :: <i>T25-cozE</i> ( <i>spd0768</i> ), <i>kan</i>                                                                                      | pACYC    | Kan                  | This study              |
| pKT25- <i>zip</i>   | P <sub>lac</sub> :: <i>T25-leucine zipper region from yeast GCN4</i> . <i>kan</i>                                                                       | pACYC    | Kan                  | <sup>18</sup>           |
| pKT25- <i>zip</i>   | P <sub>lac</sub> :: <i>T25-leucine zipper region from yeast GCN4</i> . <i>kan</i>                                                                       | pACYC    | Kan                  | <sup>18</sup>           |

### Plasmids used in this study (*continued*)

| Name                 | Genotype                                                                  | Replicon                | Resistance Marker(s) | Source or Reference     |
|----------------------|---------------------------------------------------------------------------|-------------------------|----------------------|-------------------------|
| pLEM019              | <i>bgaA'::MCS::tetM::bgaA' bla</i>                                        | pACYC                   | Tet, Amp             | This study              |
| pLEM023              | <i>bgaA'::P<sub>zn</sub>::MCS::tetM::bgaA' bla</i>                        | pACYC                   | Tet, Amp             | This study              |
| pLEM025              | <i>bgaA'::P<sub>zn</sub>::pbp1a(R6)::tet::bgaA' bla</i>                   | pACYC                   | Tet, Amp             | This study              |
| pMagellan6           | IRL(Mmel):: <i>add9::IRR(Mmel) bla</i>                                    | ColE1                   | Spec, Amp            | <sup>7</sup>            |
| 'pMalC9'             | <i>MBP::Himar1 bla</i>                                                    | pMB1<br>( <i>rop-</i> ) | Amp                  | <sup>19</sup>           |
| pRY102               | Plac:: <i>dspE(ccmG)-T18 bla</i>                                          | pUC                     | Amp                  | Cloned by Rachel Yunk   |
| pRY103               | Plac:: <i>dspE(ccmG)-T25 kan</i>                                          | pACYC                   | Kan                  | Cloned by Rachel Yunk   |
| pUC57- <i>gfp</i>    | <i>gfp, lacZ, bla</i>                                                     | pUC                     | Amp                  | Gift from the Campo lab |
| pUT18                | P <sub>lac</sub> ::- <i>T18 bla</i>                                       | pUC                     | Amp                  | <sup>18</sup>           |
| pUT18C               | P <sub>lac</sub> :: <i>T18- bla</i>                                       | pUC                     | Amp                  | <sup>18</sup>           |
| pCH363               | P <sub>lac</sub> ::- <i>T18 lacI<sup>q</sup>, bla</i>                     | pUC                     | Amp                  | <sup>20</sup>           |
| pCH363- <i>ccmF</i>  | P <sub>lac</sub> ::- <i>T18-ccmF lacI<sup>q</sup> bla</i>                 | pUC                     | Amp                  | This study              |
| pUT18C- <i>mreC</i>  | P <sub>lac</sub> :: <i>T18-mreC(S.pn) bla</i>                             | pUC                     | Amp                  | This study              |
| pUT18C- <i>mreD</i>  | P <sub>lac</sub> :: <i>T18-mreD(S.pn) bla</i>                             | pUC                     | Amp                  | This study              |
| pUT18C- <i>pbp1a</i> | P <sub>lac</sub> :: <i>T18-pbp1a(S.pn) bla</i>                            | pUC                     | Amp                  | This study              |
| pUT18C- <i>pbp2a</i> | P <sub>lac</sub> :: <i>T18-pbp2a(S.pn) bla</i>                            | pUC                     | Amp                  | This study              |
| pUT18C- <i>cozE</i>  | P <sub>lac</sub> :: <i>T18-cozE(spd0768) bla</i>                          | pUC                     | Amp                  | This study              |
| pUT18- <i>cozE</i>   | P <sub>lac</sub> :: <i>cozE-T18(spd0768) bla</i>                          | pUC                     | Amp                  | This study              |
| pUT18- <i>mreD</i>   | P <sub>lac</sub> :: <i>mreD-T18(S.pn) bla</i>                             | pUC                     | Amp                  | This study              |
| pUT18- <i>zip</i>    | P <sub>lac</sub> :: <i>T18-leucine zipper region from yeast GCN4. bla</i> | pUC                     | Amp                  | <sup>18</sup>           |

Cam = chloramphenicol, Erm = erythromycin, Kan = kanamycin, Spec = spectinomycin, Tet = tetracycline, MCS = multiple cloning site, S.pn = ORF amplified from *S. pneumoniae* D39.

## Oligonucleotides used in this study

| Name                         | Sequence (5'-3')                                                                  |
|------------------------------|-----------------------------------------------------------------------------------|
| AntibioticMarker_F           | GAGGGAGGAAAGGCAGGA                                                                |
| AntibioticMarker_R           | CGCCGTATCTGTGCTCTC                                                                |
| BgaA_3ORF_F                  | GAGAGCACAGATACGGCGGCTTCAGTCGGTGTTCTGTTTGG                                         |
| BgaA_3ORF_R                  | TGCAAAGAAGTGAAGTTTGGCTTGAGC                                                       |
| BgaA_5FLANK_F                | CCTACATTTGATGACCTTCTTAACGCC                                                       |
| BgaA_5FLANK_R                | AACTTCGTCAGTGTCGCCTTGC                                                            |
| <i>bgaA</i> _FLANK_Pfucose_F | CCTGTATCTGTTCTTGAAGTTTGGCG                                                        |
| <i>bgaA</i> _FLANK_Pfucose_R | CGTCCTTGAAGACGTTTAGTAGCAAC                                                        |
| <i>bgaA</i> _FLANK_F         | GTTGCTACTAAACGTCTTCAAGGACG                                                        |
| <i>bgaA</i> _FLANK_R         | CGCCAAACTTCAAGAACAGATACAGG                                                        |
| cbpD_5FLANK_F                | GGCAATTGACAGATGAGGAGTGG                                                           |
| cbpD_5FLANK_R                | TCCTGCCTTTCCTCCCTCGCTATAAACGGTAAAATTTTCATTCT<br>TCCTCC                            |
| cbpD_3FLANK_F                | GAGAGCACAGATACGGCGCAGTGATGGAGAACGAGTATAGA<br>AAATTGG                              |
| cbpD_3FLANK_R                | CCGTCCAAAATACTAACGATGATGGG                                                        |
| cbpD_SEQ_F                   | GTGCGGAAAGCTTGGTAGACCG                                                            |
| ccmF_BTH_C_F                 | CGTCTAGATATGATGCCAGAAATTGGTAACGGACTGCTGTGC                                        |
| ccmF_BTH_C_R                 | GCGAATTCACGGCCTCCGGCGCAGTTTTTTGC                                                  |
| Chlor_isoT_F                 | GAGGGAGGAAAGGCAGGACCGGTATCGATAAGCTTGATG                                           |
| Chlor_isoT_R                 | CGCCGTATCTGTGCTCTCAAACCTTCTTCAACTAACGGGG                                          |
| GFP/YFP_N_F                  | ATGGTTTCTAAAGGTGAAGAATTGTTTACAGGTGTTGTTCCAA<br>TTTTGG                             |
| GFP/YFP_N_R                  | GAGACCTGCTGGCCCTTCCAATTTATACAATTCATCCATACCA<br>TGTGTAATACCAGC                     |
| GFP_TTG_F                    | GAGGGAGGTAACCTTTGGTTTCTAAAGGTGAAGAATTGTTTAC<br>AGGTGTTGTTCC                       |
| GFP_TTG_R                    | CCTTTAGAAACCAAGAGTTACCTCCCTCACTTTATTTTACCATA<br>TTTTCAAAAAGCTTAACAGATGAATTATTAAGC |
| lytA_5FLANK_F                | GATGAGTTCAATTGTATCTATCGGCAGTG                                                     |

### Oligonucleotides used in this study (*continued*)

| Name              | Sequence (5'-3')                                                               |
|-------------------|--------------------------------------------------------------------------------|
| lytA_5FLANK_R     | TCCTGCCTTTCCTCCCTCCTACTCCTTATCAATTAAAACAACCTC<br>ATTTTTTACAATCC                |
| lytA_3FLANK_F     | GAGAGCACAGATACGGCGCCAGATGGCTTGATTACAGTAAAA<br>TAATAATGG                        |
| lytA_3FLANK_R     | CTCAATCTATATAACATAGCTTTATGACTGATACC                                            |
| lytA_SEQ_F        | GGACTTGCTACCATTATTTTCGCAAGG                                                    |
| MreC_BTH_N_F      | CGTCTAGATATGAACCGTTTTAAAAAATCAAATATGTCATTAT<br>TGTTTTTGCTACTG                  |
| MreC_BTH_N_R      | ATCCCGGGTTATGAATCCCACTAATTCTATCACATCTACATT<br>ATGAG                            |
| MreC_GFP/YFP_N_3F | TTGGAAGGGCCAGCAGGTCTCATGAACCGTTTTAAAAAATCAA<br>AATATGTCATTATTGTTTTTGCTACTGTTTC |
| MreC_GFP/YFP_N_5R | GTAACAATTCTTACCTTTAGAAACCATATCCCTACCTTTATA<br>TCAAAAACGTACAGTAACTTTTTA         |
| MreC_5FLANK_F     | CTGATAGAGGCGTGTCATTTAAACG                                                      |
| MreC_5FLANK_R     | TCCTGCCTTTCCTCCCTCAAACGGTTCATATCCCTACC                                         |
| MreC_3FLANK_F     | GAGAGCACAGATACGGCGGTGGGGAATTCATAATGAGAC                                        |
| MreC_3FLANK_R     | GTTTTTCCAACGATTGGTTACGAGAAAC                                                   |
| MreC_SEQ_F        | CAAGTGATGTCTTCAAGACGTTG                                                        |
| MreC_nativeRBS_F  | TATCTCGAGGCTTTCAGGAATTGATAAAAAGTTACTGTAACAG                                    |
| MreD_R            | ATAGGATCCGACAATACTAGTATACCAAAAAAAGGCC                                          |
| MreD_BTH_C_F      | CAGAAGCTTATGAGACAGTTGAAGCGAGTTGGAG                                             |
| MreD_BTH_C_R      | AGTGGATCCTCTAGATAATATTTTTCAAAAATAAATTGAAAAAC<br>AGTAATCC                       |
| MreD_BTH_N_F      | CGTCTAGATATGAGACAGTTGAAGCGAGTTGGAG                                             |
| MreD_BTH_N_R      | GCGAATTC TTATAGATAATATTTTTCAAAAATAAATTGAAAAAC<br>AGTAATCC                      |
| MreD_5FLANK_F     | CTGACCATTCTTGTTATTCTCGTACTTGG                                                  |
| MreD_5FLANK_R     | TCCTGCCTTTCCTCCCTCGCTTCAACTGTCTCATTATGAATT<br>CC                               |
| MreD_3FLANK_F     | GAGAGCACAGATACGGCGTAA GAACGACATATAAATGTAACA<br>AAGGCG                          |



### Oligonucleotides used in this study (*continued*)

|                     |                                                             |
|---------------------|-------------------------------------------------------------|
| MreD_3FLANK_R       | CATTCTCCAATTGGATAACTTGAAGCG                                 |
| MreD_SEQ_F          | GGCTATCAGGGTGGAAAAGGC                                       |
| oSp104              | CGGGATCCCGGTCAATGTTAGTCATATGG                               |
| oSp105              | ATTTGCCTCCTTAAGATCCGC                                       |
| oSp106              | GCGGATCTTAAGGAGGCAAATATGAACAAACCAACGATTCTG<br>CGC           |
| oSp107              | CGGCTCGAGTTATGGTTGTGCTGGTTGAGG                              |
| oSp108              | GCGGATCTTAAGGAGGCAAATATGAAATTAGATAAATTATTTG<br>AGAAATTC     |
| oSp109              | CGGCTCGAGTTAGCGAAATAGATTGACTATC                             |
| oSp00X              | TTTGAATTCGAATTCTAGATGGCTTTTTTTGG                            |
| oSp00Y              | TATCTCGAGTTATAATAGATTTATGAACACC                             |
| P_fucose_F4         | CGAGAATTCGGAGGAATTTGAATTATTTTTATGAATATTGGG                  |
| P_fucose_R4         | TAACTCGAGCGTCCTTGATTAACCTTTATTATAATCCCC                     |
| pbp1a_BTH_N_F       | CGTCTAGATATGAACAAACCAACGATTCTGCGCC                          |
| pbp1a_BTH_N_R       | ATCCCGGGTTATGGTTGTGCTGGTTGAGGATTCTG                         |
| PBP1A_GFP/YFP_N_3F2 | TTGGAAGGGCCAGCAGGTCTCAACAAACCAACGATTCTGCGC<br>CTAATC        |
| PBP1A_GFP/YFP_N_5R  | GTAACAATTCTTCACCTTTAGAAACCATATTTGCCTCCTTAAG<br>ATCCGCAGACTC |
| pbp1a_5FLANK_F      | GTAACACAAGCCAAGACACCCC                                      |
| pbp1a_5FLANK_R      | TCCTGCCTTTCCTCCCTCTTTGTTTCATCTTGTTTTACCACC                  |
| pbp1a_3FLANK_F      | GAGAGCACAGATACGGCGGCACAACCATAACATTTATCATCC                  |
| pbp1a_3FLANK_R      | CACGTGGATCAGGTTCAAATGG                                      |
| pbp1a_E150A_F       | GCTCAGGCTGCTTGGTTAGCGATTGAGTTAGAACAAAAGCA<br>ACC            |
| pbp1a_E150A_R       | GCTAACCAAGCAGCCTGAGCCTTACGAGAAATAGTCTGGTCG                  |
| pbp1a_E91A_F        | CGTTTCTATCGCTGACCATCGCTTCTTCGACCACAGGGGGAT<br>TG            |

**Oligonucleotides used in this study (continued)**

| Name                 | Sequence (5'-3')                                                                                              |
|----------------------|---------------------------------------------------------------------------------------------------------------|
| pbp1a_E91A_R         | GCGATGGTCAGCGATAGAAACGATTGCCTTAACCAAATCTGT<br>GGGAATATCATTAG                                                  |
| pbp1a_S370A_F        | GACTGGGGAGCTACTATGAAACCGATCACAGACTATGCTCCT<br>GC                                                              |
| pbp1a_S370A_R        | GGTTTCATAGTAGCTCCCCAGTCGCGGTTTGTTCCTACTGCTT<br>GG                                                             |
| pbp2a_5FLANK_F       | GCCTCTCTAAAGTAAGTGGG                                                                                          |
| pbp2a_5FLANK_R       | TCCTGCCTTTCCCTCCCTCCATCTTCATCATAGGAAGAC                                                                       |
| pbp2a_3FLANK_F       | GAGAGCACAGATACGGCGGATGCTTGTCAAAGCCTAGC                                                                        |
| pbp2a_3FLANK_R       | CGTACAGTTTGACCAATCTC                                                                                          |
| pbp2a_BTH_N_F        | CGTCTAGATATGAAATTAGATAAATTATTTGAGAAATTTCTTTC<br>TCTTTTTAAAAAAGAAACAAG                                         |
| pbp2a_BTH_N_R        | ATCCCGGGTTAGCGAAATAGATTGACTATCGAATCCC                                                                         |
| PBP2a_GFP/YFP_N_F    | TTGGAAGGGCCAGCAGGTCTCAAATTAGATAAATTATTTGAGA<br>AATTTCTTTCTC                                                   |
| PBP2a_GFP/YFP_N_R    | GTAACAATTCTTCACCTTTAGAAACCATATTTGCCTCCTTAAG<br>ATCCGCAGAC                                                     |
| SPD_0768_nativeRBS_F | TAACTCGAGGCTTTAATAATTCATCTGTTAAGCTTTTTGAAAAT<br>ATGG                                                          |
| SPD_0768_R           | ATAGGATCCGACTTTTACTTAGCTAATTCTCTTTCTCG                                                                        |
| SPD_0768_5FLANK_F    | CTGCATTTAAAACAACCTGTGATGACTC                                                                                  |
| SPD_0768_5FLANK_R    | TCCTGCCTTTCCCTCCTTTCTACGAAACATGAGTTACCTCC                                                                     |
| SPD_0768_3FLANK_F    | GAGAGCACAGATACGGCGGAAAGAGAATTAGCTAAGTAAAG<br>TCAGG                                                            |
| SPD_0768_3FLANK_R    | GGTTATGTATTATTTAACAGCCCCTCG                                                                                   |
| SPD_0768_Seq_F       | CGATTTTGCGAAGTGTAATGTAGAAG                                                                                    |
| SPD0768_FLAG_N_R     | TTTATCGTCGTCATCCTTG TAGTCAATGTCATGGTCTTTGTAGT<br>CTCCGTCATGGTCCTTATAGTCCATGAGTTACCTCCCTCACTT<br>TATTTTACC     |
| SPD0768_FLAG_N_F     | CATTGACTACAAGGATGACGACGATAAATTGGAAGGGCCAGC<br>AGGTCTCTTTTCGTAGAAATAAATTATTTTTTTGGACCACAGAAA<br>TTTTACTCTTAACC |

### Oligonucleotides used in this study (*continued*)

| Name                    | Sequence (5'-3')                                                                      |
|-------------------------|---------------------------------------------------------------------------------------|
| SPD0768_FLAG_Pzn_F      | ATA <u>ACTCGAGAGGAGG</u> TA <u>ACTCATGGACTATAAGGACCATGACGG</u>                        |
| SPD0768_FLAG_Pzn_R      | TAT <u>GATCCTTACTTAGCTAATTCTCTTTCTCGTTCTTTCATTA</u><br>TTTTATG                        |
| FLAG_Seq_F              | <u>CCATGACGGAGACTACAAAGACC</u>                                                        |
| SPD0768_5FLANK_insert_R | <u>GGAGATCCCCAAGTAATCGTGTTCTACGAAACATGAGTTACCT</u><br>CC                              |
| pLEM023_F               | <u>CACGATTACTTGGGGATCTCCCGCGAAAGCGGG</u>                                              |
| pLEM023_R               | <u>TCCTGCCTTTCCTCCCTCGTCATACCATGTATACCACTTGG</u>                                      |
| SPD_0768_TTG_F          | GGGAGGTA <u>ACTCTGTGTTTCGTAGAAATAAATTATTTTTTTGGAC</u><br>CACAGAAATTTACTCTTAACC        |
| SPD_0768_TTG_R          | <u>CTACGAAACA</u> AGAGTTACCTCCCTCACTTTATTTTACCATATTT<br>TCAAAAAGCTTAACAGATG           |
| SPD0768_GFP/YFP_N_5R    | <u>GTAACAATTCTTACCTTTAGAAAC</u> CATGAGTTACCTCCCTC<br>ACTTTATTTTACCATATTTTCAAAAAGC     |
| SPD0768_GFP/YFP_N_3F    | <u>TTGGAAGGGCCAGCAGGTCTCATGTTTCGTAGAAATAAATTAT</u><br>TTTTTTGGACCACAGAAATTTACTCTTAACC |
| SPD0768_BTH_C_F         | CAG <u>AAGCTT</u> ATGTTTCGTAGAAATAAATTATTTTTTTGGACCAC<br>AG                           |
| SPD0768_BTH_C_R         | AGT <u>GGATCCTCCTTAGCTAATTCTCTTTCTCGTTCTTTC</u>                                       |
| SPD0768_BTH_N_F         | <u>CGTCTAGATATGTTTCGTAGAAATAAATTATTTTTTTGGACCAC</u><br>AG                             |
| SPD0768_BTH_N_R         | G <u>CGAATTC</u> TTACTTAGCTAATTCTCTTTCTCGTTCTTTC                                      |
| Spec_isoT_F             | <u>GAGGGAGGAAAGGCAGGACCCGTTTGATTTTAAATGGTAATG</u>                                     |
| Spec_isoT_R             | <u>CGCCGTATCTGTGCTCTCAATTTTTTATAATTTTTTAAATCTG</u>                                    |
| Tet_isoT_F              | <u>GAGGGAGGAAAGGCAGGACCAAGTAATCGTGAATGTCGCTG</u>                                      |
| Tet_isoT_R              | <u>CGCCGTATCTGTGCTCTCTGCGCTCCGCTAGCTTTACAGAC</u>                                      |

Where restriction enzyme sites have been introduced into the primers, these are underlined. Any primer containing relevant sequence from an ORF are shown in **red**. Overlapping sequences used for isothermal assembly when generating gene knockout constructs are shown in **blue**. Regions where codons have been altered are highlighted in **green**. Linker regions used for GFP- fusions are shown in **purple**. Sequences used to generate the FLAG tag fusion proteins are shown in **orange**.

## Supplementary References

1. Liechti, G. W. *et al.* A new metabolic cell-wall labelling method reveals peptidoglycan in *Chlamydia trachomatis*. *Nature* **506**, 507–10 (2014).
2. Letunic, I. & Bork, P. Interactive Tree Of Life (iTOL): An online tool for phylogenetic tree display and annotation. *Bioinformatics* **23**, 127–128 (2007).
3. Paintdakhi, A. *et al.* Oufi: An integrated software package for high-accuracy, high-throughput quantitative microscopy analysis. *Mol. Microbiol.* **99**, 767–777 (2016).
4. Robertson, G. T., Ng, W., Foley, J., Gilmour, R. & Winkler, M. E. Global Transcriptional Analysis of *clpP* Mutations of Type 2 *Streptococcus pneumoniae* and Their Effects on Physiology and Virulence Global Transcriptional Analysis of *clpP* Mutations of Type 2 *Streptococcus pneumoniae* and Their Effects on Physiology and Vir. *J. Bacteriol.* **184**, 3508–3520 (2002).
5. Gibson, D. G. *et al.* Enzymatic assembly of DNA molecules up to several hundred kilobases. *Nat. Methods* **6**, 343–5 (2009).
6. Hava, D. L., Hemsley, C. J. & Camilli, A. Transcriptional regulation in the *Streptococcus pneumoniae* *rlrA* pathogenicity islet by RlrA. *J. Bacteriol.* **185**, 413–421 (2003).
7. van Opijnen, T., Bodi, K. L. & Camilli, A. Tn-seq: high-throughput parallel sequencing for fitness and genetic interaction studies in microorganisms. *Nat. Methods* **6**, 767–72 (2009).
8. Eberhardt, A., Wu, L. J., Errington, J., Vollmer, W. & Veening, J. W. Cellular localization of choline-utilization proteins in *Streptococcus pneumoniae* using novel fluorescent reporter systems. *Mol. Microbiol.* **74**, 395–408 (2009).
9. Kloosterman, T. G., Van Der Kooi-Pol, M. M., Bijlsma, J. J. E. & Kuipers, O. P. The novel transcriptional regulator SczA mediates protection against Zn<sup>2+</sup> stress by activation of the Zn<sup>2+</sup>-resistance gene *czcD* in *Streptococcus pneumoniae*. *Mol. Microbiol.* **65**, 1049–1063 (2007).
10. Lemon, K. P. & Grossman, a D. Localization of bacterial DNA polymerase: evidence for a factory model of replication. *Science* **282**, 1516–1519 (1998).
11. Sung, M. *et al.* Crystal structure of the membrane-bound bifunctional transglycosylase PBP1b from *Escherichia coli*. *Proc. Natl. Acad. Sci.* **106**, 8824–8829 (2009).
12. Job, V., Carapito, R., Vernet, T., Dessen, A. & Zapun, A. Common alterations in PBP1a from resistant *Streptococcus pneumoniae* decrease its reactivity toward  $\beta$ -lactams: Structural insights. *J. Biol. Chem.* **283**, 4886–4894 (2008).
13. Chan, P. F. *et al.* Characterization of a novel fucose-regulated promoter (PfcSK) suitable for gene essentiality and antibacterial mode-of-action studies in *Streptococcus pneumoniae*. *J. Bacteriol.* **185**, 2051–2058 (2003).
14. Lanie, J. A. *et al.* Genome sequence of Avery's virulent serotype 2 strain D39 of *Streptococcus pneumoniae* and comparison with that of unencapsulated laboratory strain R6. *J. Bacteriol.* **189**, 38–51 (2007).

15. Hoskins, J. *et al.* Genome of the Bacterium *Streptococcus pneumoniae* Strain R6. *J. Bacteriol.* **183**, 5709–5717 (2001).
16. Avery, O. T., MacLeod, C. M. & McCarty, M. Studies on the chemical nature of the substance inducing of transformation of pneumococcal types. *J. Exp. Med.* **79**, 137 – 158 (1943).
17. Sung, C. K., Li, H., Claverys, J. P. & Morrison, D. A. An rpsL Cassette , Janus , for Gene Replacement through Negative Selection in *Streptococcus pneumoniae* An rpsL Cassette , Janus , for Gene Replacement through Negative Selection in *Streptococcus pneumoniae*. *Appl. Environ. Microbiol.* **67**, 5190–5196 (2001).
18. Karimova, G., Ullmann, A. & Ladant, D. Protein-Protein Interaction Between *Bacillus stearothermophilus* Tyrosyl-tRNA Synthetase Subdomains Revealed by a Bacterial Two-Hybrid System. *J. Mol. Microbiol. Biotechnol.* **3**, 73–82 (2001).
19. Lampe, D. J., Akerley, B. J., Rubin, E. J., Mekalanos, J. J. & Robertson, H. M. Hyperactive transposase mutants of the Himar1 mariner transposon. *Proc. Natl. Acad. Sci. U. S. A.* **96**, 11428–33 (1999).
20. Bendezú, F. O., Hale, C. A., Bernhardt, T. G. & de Boer, P. A. J. RodZ (YfgA) is required for proper assembly of the MreB actin cytoskeleton and cell shape in *E. coli*. *EMBO J.* **28**, 193–204 (2009).
